# Supplementary material for: A complete toolset for the study of Ustilago bromivora and Brachypodium sp. as a fungal-temperate grass pathosystem
Source: eLife. 2016 Nov 11;5:e20522. doi: 10.7554/eLife.20522 (PMC5106213; doi:10.7554/eLife.20522)
Supplement: Figure 7—source data 1. — DOI: http://dx.doi.org/10.7554/eLife.20522.018 [file elife-20522-fig7-data1.xlsx]

## Sheet: Sheet1
Single Nucleotide Polymorphisms (SNPs) identfied in UB2*										* table was generated with CLC Genomics Workbench (v.7.0.3)
Mapping	Reference Position	Type	Length	Reference	Allele	Count	Coverage	Frequency	Forward/reverse balance	Coding region change	Amino acid change
chr01 mapping	288060	SNV	1	C	T	127	128	99.22	0.37	UBRO_01125:c.684G>A
chr01 mapping	324697	SNV	1	C	T	143	146	97.95	0.44	UBRO_01114:c.4296C>T
chr01 mapping	473032	SNV	1	C	T	139	139	100	0.45	UBRO_01052:c.12G>A
chr01 mapping	531834	SNV	1	G	A	91	91	100	0.46	UBRO_20217:c.212C>T	UBRO_20217:p.Thr71Met
chr01 mapping	609186	SNV	1	T	C	111	111	100	0.37	UBRO_00980:c.2085T>C
chr01 mapping	671096	SNV	1	G	A	143	143	100	0.5	UBRO_00962:c.473G>A	UBRO_00962:p.Gly158Asp
chr01 mapping	724499	SNV	1	T	C	100	101	99.01	0.38	UBRO_12191:c.620T>C	UBRO_12191:p.Leu207Pro
chr01 mapping	726392	SNV	1	T	C	109	109	100	0.35	UBRO_00931:c.719A>G	UBRO_00931:p.Tyr240Cys
chr01 mapping	726457	SNV	1	A	G	106	106	100	0.42	UBRO_00931:c.654T>C
chr01 mapping	726642	SNV	1	C	T	110	111	99.1	0.44	UBRO_00931:c.469G>A	UBRO_00931:p.Ala157Thr
chr01 mapping	726647	SNV	1	G	A	113	113	100	0.46	UBRO_00931:c.464C>T	UBRO_00931:p.Ser155Phe
chr01 mapping	733130	SNV	1	G	A	153	158	96.84	0.43	UBRO_00928:c.2294C>T	UBRO_00928:p.Thr765Ile
chr01 mapping	742419	SNV	1	T	C	158	158	100	0.48
chr01 mapping	743249	SNV	1	T	C	154	156	98.72	0.41	UBRO_00919:c.72T>C
chr01 mapping	745489	SNV	1	A	G	152	153	99.35	0.47	UBRO_00919:c.2312A>G	UBRO_00919:p.Lys771Arg
chr01 mapping	745761	SNV	1	C	T	157	160	98.12	0.49	UBRO_00919:c.2584C>T	UBRO_00919:p.Pro862Ser
chr01 mapping	749859	SNV	1	T	C	135	135	100	0.47	UBRO_00915:c.311T>C	UBRO_00915:p.Phe104Ser
chr01 mapping	755001	SNV	1	C	T	155	157	98.73	0.44	UBRO_00913:c.2176G>A	UBRO_00913:p.Ala726Thr
chr01 mapping	755287	SNV	1	T	C	171	171	100	0.42	UBRO_00913:c.1890A>G
chr01 mapping	756684	SNV	1	T	C	199	199	100	0.4	UBRO_00913:c.493A>G	UBRO_00913:p.Asn165Asp
chr01 mapping	759021	SNV	1	G	A	115	116	99.14	0.45
chr01 mapping	759111	SNV	1	A	G	146	146	100	0.47	UBRO_00912:c.78A>G
chr01 mapping	762770	SNV	1	T	C	101	101	100	0.46
chr01 mapping	771780	SNV	1	G	A	138	140	98.57	0.46
chr01 mapping	772608	SNV	1	G	A	101	103	98.06	0.41
chr01 mapping	777927	SNV	1	G	A	136	137	99.27	0.44	UBRO_00873:c.147C>T
chr01 mapping	778125	SNV	1	C	A	142	145	97.93	0.43
chr01 mapping	778207	SNV	1	C	G	149	149	100	0.39
chr01 mapping	778214	SNV	1	G	A	150	152	98.68	0.43
chr01 mapping	778308	SNV	1	G	A	131	131	100	0.48
chr01 mapping	778320	SNV	1	C	T	117	119	98.32	0.49
chr01 mapping	780070	SNV	1	A	G	135	135	100	0.44	UBRO_00875:c.1141A>G	UBRO_00875:p.Ile381Val
chr01 mapping	781098	SNV	1	T	C	134	134	100	0.45	UBRO_00875:c.2169T>C
chr01 mapping	781694	SNV	1	C	T	96	96	100	0.37
chr01 mapping	782705	SNV	1	T	C	149	150	99.33	0.49	UBRO_00876:c.44A>G	UBRO_00876:p.His15Arg
chr01 mapping	782826	SNV	1	G	A	145	146	99.32	0.43
chr01 mapping	783343	SNV	1	G	A	123	125	98.4	0.37	UBRO_00877:c.4711C>T	UBRO_00877:p.His1571Tyr
chr01 mapping	784462	SNV	1	C	T	165	168	98.21	0.5	UBRO_00877:c.3592G>A	UBRO_00877:p.Asp1198Asn
chr01 mapping	784987	SNV	1	G	C	148	149	99.33	0.45	UBRO_00877:c.3067C>G	UBRO_00877:p.Gln1023Glu
chr01 mapping	785054	SNV	1	T	C	147	148	99.32	0.48	UBRO_00877:c.3000A>G
chr01 mapping	786237	SNV	1	C	G	163	163	100	0.43	UBRO_00877:c.1817G>C	UBRO_00877:p.Ser606Thr
chr01 mapping	789512	SNV	1	G	A	125	125	100	0.44
chr01 mapping	798257	SNV	1	C	T	111	111	100	0.36	UBRO_00851:c.4G>A	UBRO_00851:p.Gly2Arg
chr01 mapping	799235	SNV	1	G	A	135	136	99.26	0.44
chr01 mapping	807358	SNV	1	T	C	108	108	100	0.48
chr01 mapping	807438	SNV	1	G	A	115	115	100	0.37
chr01 mapping	807557	SNV	1	A	G	97	98	98.98	0.38
chr01 mapping	807614	SNV	1	C	T	89	91	97.8	0.42
chr01 mapping	808983	SNV	1	A	G	95	96	98.96	0.47
chr01 mapping	809609	SNV	1	G	A	129	129	100	0.48	UBRO_00905:c.624G>A
chr01 mapping	810042	SNV	1	A	G	146	146	100	0.41	UBRO_00905:c.1057A>G	UBRO_00905:p.Ile353Val
chr01 mapping	810589	SNV	1	A	G	142	142	100	0.49	UBRO_00905:c.1604A>G	UBRO_00905:p.Lys535Arg
chr01 mapping	812260	SNV	1	G	A	164	165	99.39	0.41	UBRO_00906:c.662C>T	UBRO_00906:p.Ala221Val
chr01 mapping	821012	SNV	1	T	C	130	130	100	0.45
chr01 mapping	821892	SNV	1	T	C	101	101	100	0.44
chr01 mapping	824059	SNV	1	T	C	135	135	100	0.4	UBRO_00869:c.889T>C	UBRO_00869:p.Cys297Arg
chr01 mapping	832372	SNV	1	T	G	117	117	100	0.44
chr01 mapping	832980	SNV	1	A	G	106	106	100	0.41
chr01 mapping	833191	SNV	1	A	G	112	113	99.12	0.47
chr01 mapping	833366	SNV	1	T	C	124	124	100	0.39
chr01 mapping	834097	SNV	1	A	G	99	99	100	0.45	UBRO_00862:c.711A>G
chr01 mapping	839900	SNV	1	T	A	139	140	99.29	0.48
chr01 mapping	839984	SNV	1	A	G	125	125	100	0.4
chr01 mapping	851908	SNV	1	T	G	133	133	100	0.38	UBRO_00859:c.1651T>G	UBRO_00859:p.Phe551Val
chr01 mapping	853195	SNV	1	T	C	104	104	100	0.43
chr01 mapping	853270	SNV	1	T	C	97	97	100	0.38
chr01 mapping	853353	SNV	1	C	A	99	99	100	0.39
chr01 mapping	853683	SNV	1	A	G	100	100	100	0.47
chr01 mapping	853734	SNV	1	G	A	151	154	98.05	0.45
chr01 mapping	854075	MNV	2	CA	TG	101	142	71.13	0.48
chr01 mapping	854085	SNV	1	C	A	93	128	72.66	0.47
chr01 mapping	855665	MNV	2	CA	TG	104	105	99.05	0.34
chr01 mapping	855735	SNV	1	C	A	99	102	97.06	0.4
chr01 mapping	856692	SNV	1	C	T	108	111	97.3	0.46
chr01 mapping	857411	SNV	1	G	A	118	119	99.16	0.45	UBRO_00858:c.612G>A
chr01 mapping	857772	SNV	1	G	C	121	121	100	0.45	UBRO_00858:c.973G>C	UBRO_00858:p.Val325Leu
chr01 mapping	858600	SNV	1	G	A	159	160	99.38	0.41	UBRO_12050:c.1210C>T	UBRO_12050:p.His404Tyr
chr01 mapping	859484	SNV	1	A	G	107	108	99.07	0.47	UBRO_12050:c.326T>C	UBRO_12050:p.Val109Ala
chr01 mapping	859501	SNV	1	T	C	106	107	99.07	0.49	UBRO_12050:c.309A>G
chr01 mapping	860021	SNV	1	T	C	103	105	98.1	0.48
chr01 mapping	863170	SNV	1	T	G	187	187	100	0.44	UBRO_00854:c.1873T>G	UBRO_00854:p.Tyr625Asp
chr01 mapping	863495	SNV	1	T	C	155	156	99.36	0.47	UBRO_00854:c.2198T>C	UBRO_00854:p.Val733Ala
chr01 mapping	863774	SNV	1	C	T	168	169	99.41	0.43	UBRO_00854:c.2477C>T	UBRO_00854:p.Ser826Phe
chr01 mapping	863880	SNV	1	A	G	154	154	100	0.45	UBRO_00854:c.2583A>G
chr01 mapping	864013	SNV	1	T	A	177	181	97.79	0.37	UBRO_00854:c.2716T>A	UBRO_00854:p.Ser906Thr
chr01 mapping	864223	SNV	1	T	G	113	114	99.12	0.25	UBRO_00854:c.2926T>G	UBRO_00854:p.Ser976Ala
chr01 mapping	864303	SNV	1	G	A	100	100	100	0.28	UBRO_00854:c.3006G>A
chr01 mapping	864390	SNV	1	A	G	101	101	100	0.26
chr01 mapping	864397	SNV	1	G	A	103	105	98.1	0.27
chr01 mapping	865274	SNV	1	A	C	106	106	100	0.43	UBRO_00853:c.5039T>G	UBRO_00853:p.Ile1680Arg
chr01 mapping	866142	MNV	2	TC	CT	91	96	94.79	0.43	UBRO_00853:c.4170_4171delGAinsAG	UBRO_00853:p.Gly1390_Thr1391delinsGlyAla
chr01 mapping	866236	SNV	1	C	T	111	112	99.11	0.47	UBRO_00853:c.4077G>A
chr01 mapping	866359	SNV	1	T	C	121	121	100	0.5	UBRO_00853:c.3954A>G
chr01 mapping	866445	SNV	1	C	T	111	113	98.23	0.49	UBRO_00853:c.3868G>A	UBRO_00853:p.Glu1290Lys
chr01 mapping	866546	SNV	1	T	G	112	112	100	0.48	UBRO_00853:c.3767A>C	UBRO_00853:p.Tyr1256Ser
chr01 mapping	866731	SNV	1	C	T	98	99	98.99	0.49	UBRO_00853:c.3582G>A
chr01 mapping	866740	SNV	1	A	C	97	99	97.98	0.48	UBRO_00853:c.3573T>G
chr01 mapping	866766	SNV	1	T	C	102	103	99.03	0.42	UBRO_00853:c.3547A>G	UBRO_00853:p.Thr1183Ala
chr01 mapping	866841	SNV	1	C	T	94	94	100	0.47	UBRO_00853:c.3472G>A	UBRO_00853:p.Ala1158Thr
chr01 mapping	866851	SNV	1	T	C	95	95	100	0.46	UBRO_00853:c.3462A>G
chr01 mapping	867620	SNV	1	A	C	152	152	100	0.47	UBRO_00853:c.2693T>G	UBRO_00853:p.Ile898Ser
chr01 mapping	869062	SNV	1	T	C	185	187	98.93	0.42	UBRO_00853:c.1251A>G
chr01 mapping	870978	SNV	1	C	T	98	108	90.74	0.48
chr01 mapping	870989	SNV	1	C	T	122	122	100	0.48	UBRO_20209:c.9C>T
chr01 mapping	871008	MNV	2	TG	CA	122	125	97.6	0.48	UBRO_20209:c.28_29delTGinsCA	UBRO_20209:p.Cys10His
chr01 mapping	871016	SNV	1	A	T	129	142	90.85	0.46	UBRO_20209:c.36A>T
chr01 mapping	871019	SNV	1	A	T	133	144	92.36	0.44	UBRO_20209:c.39A>T
chr01 mapping	871032	SNV	1	T	G	110	111	99.1	0.44	UBRO_20209:c.52T>G	UBRO_20209:p.Ser18Ala
chr01 mapping	871037	SNV	1	T	C	113	115	98.26	0.42	UBRO_20209:c.57T>C
chr01 mapping	871053	SNV	1	A	G	127	127	100	0.4	UBRO_20209:c.73A>G	UBRO_20209:p.Ser25Gly
chr01 mapping	871076	SNV	1	A	G	119	119	100	0.35	UBRO_20209:c.96A>G
chr01 mapping	871079	SNV	1	G	A	117	117	100	0.36	UBRO_20209:c.99G>A
chr01 mapping	871087	MNV	2	TG	CA	94	95	98.95	0.38	UBRO_20209:c.107_108delTGinsCA	UBRO_20209:p.Val36Ala
chr01 mapping	871459	SNV	1	G	A	113	115	98.26	0.42	UBRO_20209:c.405G>A
chr01 mapping	871468	MNV	2	CA	TG	110	112	98.21	0.38	UBRO_20209:c.414_415delCAinsTG	UBRO_20209:p.Gly138_Asn139delinsGlyAsp
chr01 mapping	871474	SNV	1	G	C	112	112	100	0.41	UBRO_20209:c.420G>C
chr01 mapping	871479	SNV	1	T	C	100	100	100	0.41	UBRO_20209:c.425T>C	UBRO_20209:p.Leu142Pro
chr01 mapping	871484	SNV	1	C	T	99	99	100	0.41	UBRO_20209:c.430C>T
chr01 mapping	871493	MNV	2	CA	TG	102	103	99.03	0.44	UBRO_20209:c.439_440delCAinsTG	UBRO_20209:p.Gln147Trp
chr01 mapping	871504	SNV	1	T	C	111	111	100	0.48	UBRO_20209:c.450T>C
chr01 mapping	871510	SNV	1	A	G	109	110	99.09	0.47	UBRO_20209:c.456A>G
chr01 mapping	871514	MNV	2	CA	AG	102	103	99.03	0.48	UBRO_20209:c.460_461delCAinsAG	UBRO_20209:p.Gln154Arg
chr01 mapping	871533	MNV	2	TG	CA	115	115	100	0.48	UBRO_20209:c.479_480delTGinsCA	UBRO_20209:p.Val160Ala
chr01 mapping	871539	SNV	1	C	G	97	98	98.98	0.44	UBRO_20209:c.485C>G	UBRO_20209:p.Ala162Gly
chr01 mapping	871544	SNV	1	G	A	97	97	100	0.44	UBRO_20209:c.490G>A	UBRO_20209:p.Gly164Ser
chr01 mapping	871551	SNV	1	G	A	118	119	99.16	0.5	UBRO_20209:c.497G>A	UBRO_20209:p.Gly166Asp
chr01 mapping	871553	SNV	1	T	C	119	119	100	0.5	UBRO_20209:c.499T>C
chr01 mapping	871559	MNV	3	TGA	CAC	106	107	99.07	0.49	UBRO_20209:c.501+4_501+6delTGAinsCAC
chr01 mapping	871571	MNV	2	TG	CA	125	125	100	0.48	UBRO_20209:c.501+16_501+17delTGinsCA
chr01 mapping	871579	MNV	2	CA	TG	128	129	99.22	0.48	UBRO_20209:c.501+24_501+25delCAinsTG
chr01 mapping	871585	MNV	2	CA	TG	126	127	99.21	0.48	UBRO_20209:c.501+30_501+31delCAinsTG
chr01 mapping	871606	MNV	3	AAT	GGC	124	124	100	0.48	UBRO_20209:c.502-13_502-11delAATinsGGC
chr01 mapping	871618	SNV	1	G	A	139	141	98.58	0.47	UBRO_20209:c.502-1G>A
chr01 mapping	871622	SNV	1	T	C	141	141	100	0.45	UBRO_20209:c.505T>C
chr01 mapping	871626	SNV	1	G	T	142	142	100	0.44	UBRO_20209:c.509G>T	UBRO_20209:p.Trp170Leu
chr01 mapping	871635	SNV	1	C	A	146	147	99.32	0.47	UBRO_20209:c.518C>A	UBRO_20209:p.Pro173His
chr01 mapping	871639	SNV	1	A	C	148	148	100	0.47	UBRO_20209:c.522A>C	UBRO_20209:p.Lys174Asn
chr01 mapping	871657	SNV	1	C	A	141	141	100	0.44	UBRO_20209:c.540C>A
chr01 mapping	875228	SNV	1	G	A	88	130	67.69	0.42	UBRO_20208:c.421C>T
chr01 mapping	875232	SNV	1	A	T	131	132	99.24	0.49	UBRO_20208:c.417T>A
chr01 mapping	875234	SNV	1	C	T	131	132	99.24	0.49	UBRO_20208:c.415G>A	UBRO_20208:p.Ala139Thr
chr01 mapping	875253	SNV	1	A	G	90	153	58.82	0.45	UBRO_20208:c.396T>C
chr01 mapping	875255	SNV	1	T	G	90	154	58.44	0.44	UBRO_20208:c.394A>C	UBRO_20208:p.Thr132Pro
chr01 mapping	875263	SNV	1	T	G	159	161	98.76	0.48	UBRO_20208:c.386A>C	UBRO_20208:p.Glu129Ala
chr01 mapping	875268	SNV	1	C	A	91	164	55.49	0.44	UBRO_20208:c.381G>T	UBRO_20208:p.Met127Ile
chr01 mapping	875301	SNV	1	G	A	177	179	98.88	0.47	UBRO_20208:c.348C>T
chr01 mapping	875329	SNV	1	A	G	179	179	100	0.47	UBRO_20208:c.320T>C	UBRO_20208:p.Leu107Ser
chr01 mapping	875335	SNV	1	G	T	173	174	99.43	0.47	UBRO_20208:c.314C>A	UBRO_20208:p.Ser105Tyr
chr01 mapping	875352	MNV	3	CCA	TTG	152	153	99.35	0.44	UBRO_20208:c.295_297delTGGinsCAA	UBRO_20208:p.Trp99Gln
chr01 mapping	875367	SNV	1	C	T	154	159	96.86	0.43	UBRO_20208:c.282G>A
chr01 mapping	875369	SNV	1	G	T	86	161	53.42	0.42	UBRO_20208:c.280C>A	UBRO_20208:p.Gln94Lys
chr01 mapping	875379	SNV	1	T	C	90	169	53.25	0.44	UBRO_20208:c.270A>G
chr01 mapping	875384	MNV	2	TG	CA	142	143	99.3	0.46	UBRO_20208:c.264_265delCAinsTG	UBRO_20208:p.Ile88_Thr89delinsIleAla
chr01 mapping	892572	SNV	1	C	T	142	144	98.61	0.47	UBRO_00879:c.1834G>A	UBRO_00879:p.Asp612Asn
chr01 mapping	892844	SNV	1	T	A	160	161	99.38	0.42	UBRO_00879:c.1562A>T	UBRO_00879:p.Glu521Val
chr01 mapping	892865	SNV	1	C	T	160	161	99.38	0.45	UBRO_00879:c.1541G>A	UBRO_00879:p.Gly514Glu
chr01 mapping	892892	SNV	1	C	T	146	146	100	0.47	UBRO_00879:c.1514G>A	UBRO_00879:p.Arg505Gln
chr01 mapping	892941	SNV	1	A	G	151	153	98.69	0.48	UBRO_00879:c.1465T>C	UBRO_00879:p.Tyr489His
chr01 mapping	892968	SNV	1	A	C	147	147	100	0.48	UBRO_00879:c.1438T>G	UBRO_00879:p.Leu480Val
chr01 mapping	892999	SNV	1	T	C	146	147	99.32	0.48	UBRO_00879:c.1407A>G
chr01 mapping	893017	SNV	1	G	A	151	152	99.34	0.48	UBRO_00879:c.1389C>T
chr01 mapping	893034	SNV	1	A	G	157	157	100	0.49	UBRO_00879:c.1372T>C	UBRO_00879:p.Ser458Pro
chr01 mapping	893052	SNV	1	T	C	156	156	100	0.47	UBRO_00879:c.1354A>G	UBRO_00879:p.Ser452Gly
chr01 mapping	893101	SNV	1	A	C	165	166	99.4	0.49	UBRO_00879:c.1305T>G	UBRO_00879:p.Asp435Glu
chr01 mapping	893143	SNV	1	A	G	171	172	99.42	0.48	UBRO_00879:c.1263T>C
chr01 mapping	894826	SNV	1	C	T	117	118	99.15	0.26	UBRO_00880:c.755G>A
chr01 mapping	895335	SNV	1	A	G	142	143	99.3	0.4	UBRO_00880:c.246T>C
chr01 mapping	895659	SNV	1	A	G	117	119	98.32	0.38	UBRO_00880:c.20T>C	UBRO_00880:p.Ile7Thr
chr01 mapping	895730	SNV	1	G	A	97	105	92.38	0.37
chr01 mapping	896191	SNV	1	C	T	119	122	97.54	0.49
chr01 mapping	897386	SNV	1	G	A	92	92	100	0.46
chr01 mapping	897619	SNV	1	C	T	94	95	98.95	0.45
chr01 mapping	897654	SNV	1	C	T	98	101	97.03	0.43
chr01 mapping	899867	SNV	1	C	T	136	137	99.27	0.45	UBRO_12088:c.3518G>A	UBRO_12088:p.Gly1173Asp
chr01 mapping	900856	SNV	1	G	C	161	163	98.77	0.45	UBRO_12088:c.2529C>G
chr01 mapping	901040	SNV	1	A	G	161	161	100	0.5	UBRO_12088:c.2345T>C	UBRO_12088:p.Val782Ala
chr01 mapping	901657	SNV	1	C	T	155	158	98.1	0.49	UBRO_12088:c.1728G>A
chr01 mapping	902384	SNV	1	C	T	142	143	99.3	0.45	UBRO_12088:c.1001G>A	UBRO_12088:p.Gly334Asp
chr01 mapping	904000	SNV	1	G	A	163	163	100	0.42	UBRO_00883:c.201G>A
chr01 mapping	904096	SNV	1	C	A	161	162	99.38	0.43	UBRO_00883:c.297C>A
chr01 mapping	906930	SNV	1	C	T	102	102	100	0.37	UBRO_00884:c.399G>A
chr01 mapping	907785	SNV	1	G	A	115	115	100	0.41
chr01 mapping	907812	SNV	1	A	G	109	109	100	0.45
chr01 mapping	907840	SNV	1	T	C	111	111	100	0.42
chr01 mapping	910448	MNV	2	AA	CG	109	110	99.09	0.46	UBRO_00887:c.516_517delAAinsCG	UBRO_00887:p.Arg172_Ile173delinsArgVal
chr01 mapping	910469	SNV	1	G	A	141	142	99.3	0.47	UBRO_00887:c.537G>A
chr01 mapping	910478	SNV	1	C	G	148	149	99.33	0.49	UBRO_00887:c.546C>G
chr01 mapping	910496	SNV	1	G	A	134	138	97.1	0.49	UBRO_00887:c.564G>A
chr01 mapping	910499	SNV	1	A	G	134	137	97.81	0.49	UBRO_00887:c.567A>G
chr01 mapping	910506	SNV	1	T	C	125	125	100	0.47	UBRO_00887:c.574T>C
chr01 mapping	910925	SNV	1	G	T	89	91	97.8	0.46	UBRO_00887:c.735G>T
chr01 mapping	910930	MNV	2	TT	CA	91	91	100	0.46	UBRO_00887:c.740_741delTTinsCA	UBRO_00887:p.Ile247Thr
chr01 mapping	910949	SNV	1	A	G	117	117	100	0.46	UBRO_00887:c.759A>G
chr01 mapping	910952	SNV	1	A	T	117	118	99.15	0.46	UBRO_00887:c.762A>T
chr01 mapping	910954	SNV	1	T	A	118	118	100	0.46	UBRO_00887:c.764T>A	UBRO_00887:p.Val255Asp
chr01 mapping	910970	SNV	1	A	G	130	130	100	0.44	UBRO_00887:c.780A>G
chr01 mapping	911004	SNV	1	G	A	125	126	99.21	0.48	UBRO_00887:c.814G>A	UBRO_00887:p.Gly272Ser
chr01 mapping	911050	SNV	1	G	A	118	122	96.72	0.45	UBRO_00887:c.860G>A	UBRO_00887:p.Ser287Asn
chr01 mapping	911067	SNV	1	T	C	122	127	96.06	0.5	UBRO_00887:c.877T>C	UBRO_00887:p.Phe293Leu
chr01 mapping	911069	SNV	1	C	T	119	127	93.7	0.5	UBRO_00887:c.879C>T
chr01 mapping	911085	SNV	1	A	C	130	131	99.24	0.47	UBRO_00887:c.895A>C	UBRO_00887:p.Thr299Pro
chr01 mapping	911099	SNV	1	A	G	124	128	96.88	0.5	UBRO_00887:c.909A>G
chr01 mapping	911111	SNV	1	T	C	127	128	99.22	0.48	UBRO_00887:c.921T>C
chr01 mapping	911121	SNV	1	A	G	122	123	99.19	0.49	UBRO_00887:c.931A>G	UBRO_00887:p.Lys311Glu
chr01 mapping	911155	SNV	1	C	T	136	137	99.27	0.43	UBRO_00887:c.965C>T	UBRO_00887:p.Ser322Leu
chr01 mapping	911223	SNV	1	T	C	135	136	99.26	0.45	UBRO_00887:c.1033T>C	UBRO_00887:p.Tyr345His
chr01 mapping	911293	SNV	1	A	C	146	146	100	0.45	UBRO_00887:c.1103A>C	UBRO_00887:p.Asn368Thr
chr01 mapping	911307	SNV	1	C	T	143	143	100	0.48	UBRO_00887:c.1117C>T	UBRO_00887:p.Pro373Ser
chr01 mapping	911322	SNV	1	T	G	142	142	100	0.44	UBRO_00887:c.1132T>G	UBRO_00887:p.Ser378Ala
chr01 mapping	911331	SNV	1	A	G	135	138	97.83	0.44	UBRO_00887:c.1141A>G	UBRO_00887:p.Arg381Gly
chr01 mapping	911333	SNV	1	A	G	137	137	100	0.43	UBRO_00887:c.1143A>G
chr01 mapping	911347	SNV	1	C	T	151	152	99.34	0.43	UBRO_00887:c.1157C>T	UBRO_00887:p.Ser386Leu
chr01 mapping	911372	SNV	1	C	T	147	150	98	0.45	UBRO_00887:c.1182C>T
chr01 mapping	911377	SNV	1	G	A	148	148	100	0.47	UBRO_00887:c.1187G>A	UBRO_00887:p.Ser396Asn
chr01 mapping	911381	SNV	1	C	T	144	144	100	0.49	UBRO_00887:c.1191C>T
chr01 mapping	911393	SNV	1	C	G	150	150	100	0.47	UBRO_00887:c.1203C>G	UBRO_00887:p.His401Gln
chr01 mapping	911426	SNV	1	C	G	159	159	100	0.49	UBRO_00887:c.1236C>G	UBRO_00887:p.Asp412Glu
chr01 mapping	911474	SNV	1	C	T	130	131	99.24	0.46	UBRO_00887:c.1284C>T
chr01 mapping	911480	SNV	1	A	G	131	135	97.04	0.47	UBRO_00887:c.1290A>G
chr01 mapping	911492	SNV	1	C	T	138	140	98.57	0.48	UBRO_00887:c.1302C>T
chr01 mapping	911507	SNV	1	G	C	137	139	98.56	0.46	UBRO_00887:c.1317G>C
chr01 mapping	911510	SNV	1	C	T	135	135	100	0.45	UBRO_00887:c.1320C>T
chr01 mapping	911519	SNV	1	A	T	127	127	100	0.44	UBRO_00887:c.1329A>T
chr01 mapping	911525	SNV	1	G	A	117	118	99.15	0.45	UBRO_00887:c.1335G>A
chr01 mapping	911530	MNV	2	AA	CT	100	100	100	0.42	UBRO_00887:c.1340_1341delAAinsCT	UBRO_00887:p.Glu447Ala
chr01 mapping	911537	SNV	1	C	G	98	98	100	0.42	UBRO_00887:c.1347C>G	UBRO_00887:p.Asp449Glu
chr01 mapping	911540	SNV	1	G	A	101	102	99.02	0.42	UBRO_00887:c.1350G>A
chr01 mapping	911545	MNV	3	TAT	CTG	92	92	100	0.43	UBRO_00887:c.1355_1357delTATinsCTG	UBRO_00887:p.Val452_Ser453delinsAlaAla
chr01 mapping	911552	SNV	1	T	A	133	134	99.25	0.41	UBRO_00887:c.1362T>A
chr01 mapping	911558	SNV	1	C	T	137	138	99.28	0.41	UBRO_00887:c.1368C>T
chr01 mapping	911596	SNV	1	T	G	166	167	99.4	0.42	UBRO_00887:c.1406T>G	UBRO_00887:p.Val469Gly
chr01 mapping	911894	SNV	1	T	C	133	134	99.25	0.39	UBRO_00887:c.1704T>C
chr01 mapping	912076	SNV	1	G	C	122	122	100	0.42	UBRO_00887:c.1886G>C	UBRO_00887:p.Arg629Thr
chr01 mapping	912598	SNV	1	A	G	99	101	98.02	0.49	UBRO_00890:c.2609T>C	UBRO_00890:p.Val870Ala
chr01 mapping	912679	SNV	1	C	G	91	92	98.91	0.48	UBRO_00890:c.2528G>C	UBRO_00890:p.Arg843Thr
chr01 mapping	913071	SNV	1	T	C	109	109	100	0.42	UBRO_00890:c.2136A>G
chr01 mapping	913564	SNV	1	T	C	110	111	99.1	0.48	UBRO_00890:c.1643A>G	UBRO_00890:p.Gln548Arg
chr01 mapping	914494	SNV	1	T	C	116	117	99.15	0.39	UBRO_00890:c.713A>G	UBRO_00890:p.Glu238Gly
chr01 mapping	914745	SNV	1	T	C	96	96	100	0.46	UBRO_00890:c.462A>G
chr01 mapping	916207	SNV	1	G	A	111	113	98.23	0.46	UBRO_00894:c.136G>A	UBRO_00894:p.Val46Ile
chr01 mapping	916344	SNV	1	T	C	118	119	99.16	0.48	UBRO_00894:c.273T>C
chr01 mapping	916535	SNV	1	C	T	103	104	99.04	0.42	UBRO_00894:c.464C>T	UBRO_00894:p.Thr155Met
chr01 mapping	921159	SNV	1	A	G	92	94	97.87	0.38
chr01 mapping	925225	SNV	1	A	G	96	96	100	0.41
chr01 mapping	928782	SNV	1	T	C	103	103	100	0.39
chr01 mapping	928802	SNV	1	G	A	120	121	99.17	0.38
chr01 mapping	928818	SNV	1	C	T	128	128	100	0.38
chr01 mapping	928824	SNV	1	T	C	123	123	100	0.38
chr01 mapping	928829	SNV	1	T	C	120	120	100	0.39
chr01 mapping	928833	SNV	1	G	A	116	117	99.15	0.38
chr01 mapping	928836	SNV	1	C	T	121	121	100	0.37
chr01 mapping	928853	SNV	1	G	A	126	128	98.44	0.41
chr01 mapping	928860	SNV	1	A	G	127	127	100	0.42
chr01 mapping	928872	SNV	1	C	T	122	122	100	0.4
chr01 mapping	928877	SNV	1	A	G	122	122	100	0.41
chr01 mapping	928891	SNV	1	G	A	118	118	100	0.42
chr01 mapping	929042	SNV	1	C	T	143	144	99.31	0.49	UBRO_03911:c.121C>T	UBRO_03911:p.Pro41Ser
chr01 mapping	929073	SNV	1	T	G	132	133	99.25	0.5	UBRO_03911:c.149+3T>G
chr01 mapping	929077	SNV	1	C	T	136	136	100	0.48	UBRO_03911:c.149+7C>T
chr01 mapping	929092	SNV	1	A	G	138	138	100	0.45	UBRO_03911:c.149+22A>G
chr01 mapping	929120	SNV	1	C	T	145	147	98.64	0.39	UBRO_03911:c.149+50C>T
chr01 mapping	929174	SNV	1	T	C	131	132	99.24	0.35	UBRO_03911:c.150-55T>C
chr01 mapping	929178	SNV	1	T	C	137	137	100	0.37	UBRO_03911:c.150-51T>C
chr01 mapping	929186	SNV	1	A	G	141	141	100	0.38	UBRO_03911:c.150-43A>G
chr01 mapping	929200	SNV	1	C	T	139	141	98.58	0.43	UBRO_03911:c.150-29C>T
chr01 mapping	929221	SNV	1	A	C	147	147	100	0.47	UBRO_03911:c.150-8A>C
chr01 mapping	929324	SNV	1	T	G	146	147	99.32	0.39	UBRO_03911:c.222+23T>G
chr01 mapping	929342	SNV	1	T	A	145	145	100	0.47	UBRO_03911:c.222+41T>A
chr01 mapping	929344	SNV	1	G	C	143	145	98.62	0.47	UBRO_03911:c.222+43G>C
chr01 mapping	929388	SNV	1	T	A	137	137	100	0.47	UBRO_03911:c.223-67T>A
chr01 mapping	929433	SNV	1	T	C	128	128	100	0.44	UBRO_03911:c.223-22T>C
chr01 mapping	929435	MNV	2	CC	GG	130	130	100	0.45	UBRO_03911:c.223-20_223-19delCCinsGG
chr01 mapping	929458	SNV	1	G	A	136	137	99.27	0.46	UBRO_03911:c.226G>A	UBRO_03911:p.Val76Ile
chr01 mapping	929531	SNV	1	T	C	143	144	99.31	0.43	UBRO_03911:c.299T>C	UBRO_03911:p.Ile100Thr
chr01 mapping	929541	SNV	1	T	C	147	147	100	0.41	UBRO_03911:c.309T>C
chr01 mapping	929626	SNV	1	A	G	166	166	100	0.44	UBRO_03911:c.394A>G	UBRO_03911:p.Ser132Gly
chr01 mapping	929683	SNV	1	A	G	158	160	98.75	0.49	UBRO_03911:c.408+43A>G
chr01 mapping	929707	SNV	1	A	G	152	154	98.7	0.49	UBRO_03911:c.409-53A>G
chr01 mapping	929726	SNV	1	C	T	129	129	100	0.49	UBRO_03911:c.409-34C>T
chr01 mapping	929807	SNV	1	T	C	115	115	100	0.46	UBRO_03911:c.456T>C
chr01 mapping	936040	SNV	1	C	A	99	100	99	0.41	UBRO_03914:c.3295G>T	UBRO_03914:p.Ala1099Ser
chr01 mapping	936177	SNV	1	G	T	115	116	99.14	0.42	UBRO_03914:c.3158C>A	UBRO_03914:p.Pro1053His
chr01 mapping	936402	SNV	1	G	C	141	142	99.3	0.39	UBRO_03914:c.2933C>G	UBRO_03914:p.Ala978Gly
chr01 mapping	936436	SNV	1	T	C	142	142	100	0.43	UBRO_03914:c.2899A>G	UBRO_03914:p.Asn967Asp
chr01 mapping	936797	SNV	1	T	C	162	162	100	0.5	UBRO_03914:c.2538A>G
chr01 mapping	936800	SNV	1	A	T	165	165	100	0.49	UBRO_03914:c.2535T>A
chr01 mapping	936870	SNV	1	T	C	176	178	98.88	0.47	UBRO_03914:c.2465A>G	UBRO_03914:p.His822Arg
chr01 mapping	936947	SNV	1	A	G	163	163	100	0.5	UBRO_03914:c.2388T>C
chr01 mapping	937019	SNV	1	A	G	167	170	98.24	0.4	UBRO_03914:c.2316T>C
chr01 mapping	937021	SNV	1	A	G	171	171	100	0.41	UBRO_03914:c.2314T>C	UBRO_03914:p.Ser772Pro
chr01 mapping	937054	SNV	1	G	T	178	181	98.34	0.37	UBRO_03914:c.2281C>A	UBRO_03914:p.Arg761Ser
chr01 mapping	937132	SNV	1	T	C	166	166	100	0.49	UBRO_03914:c.2203A>G	UBRO_03914:p.Ile735Val
chr01 mapping	937150	SNV	1	C	G	161	162	99.38	0.47	UBRO_03914:c.2185G>C	UBRO_03914:p.Val729Leu
chr01 mapping	937159	SNV	1	C	T	163	172	94.77	0.5	UBRO_03914:c.2176G>A	UBRO_03914:p.Ala726Thr
chr01 mapping	937340	SNV	1	A	G	146	147	99.32	0.48	UBRO_03914:c.1995T>C
chr01 mapping	937705	SNV	1	T	C	146	148	98.65	0.42	UBRO_03914:c.1630A>G	UBRO_03914:p.Thr544Ala
chr01 mapping	937790	SNV	1	C	T	153	156	98.08	0.48	UBRO_03914:c.1545G>A
chr01 mapping	939232	SNV	1	A	G	161	162	99.38	0.41	UBRO_03914:c.198T>C
chr01 mapping	940431	SNV	1	G	A	129	131	98.47	0.38
chr01 mapping	940825	SNV	1	A	G	117	117	100	0.4
chr01 mapping	942570	SNV	1	C	G	109	109	100	0.49
chr01 mapping	942659	SNV	1	T	G	101	102	99.02	0.41
chr01 mapping	942669	SNV	1	T	C	102	102	100	0.45
chr01 mapping	943136	SNV	1	T	C	140	141	99.29	0.43
chr01 mapping	943664	SNV	1	A	T	141	144	97.92	0.47
chr01 mapping	943817	SNV	1	A	C	115	116	99.14	0.5
chr01 mapping	944875	MNV	2	TG	CA	101	108	93.52	0.46
chr01 mapping	946448	SNV	1	G	A	90	90	100	0.47
chr01 mapping	947211	SNV	1	C	T	136	136	100	0.39
chr01 mapping	947270	SNV	1	C	T	100	152	65.79	0.36
chr01 mapping	947309	SNV	1	G	A	88	139	63.31	0.39
chr01 mapping	947630	SNV	1	T	G	99	100	99	0.44
chr01 mapping	948517	SNV	1	T	A	94	95	98.95	0.44
chr01 mapping	948970	SNV	1	T	C	91	91	100	0.38
chr01 mapping	949036	SNV	1	A	G	101	101	100	0.45
chr01 mapping	949092	SNV	1	A	G	97	97	100	0.5
chr01 mapping	949101	SNV	1	T	C	97	97	100	0.47
chr01 mapping	953073	SNV	1	T	C	152	152	100	0.38
chr01 mapping	953866	SNV	1	T	C	154	156	98.72	0.45	UBRO_03916:c.3159A>G
chr01 mapping	953926	SNV	1	G	A	195	196	99.49	0.41	UBRO_03916:c.3099C>T
chr01 mapping	956364	SNV	1	T	C	158	158	100	0.49	UBRO_03916:c.661A>G	UBRO_03916:p.Arg221Gly
chr01 mapping	956861	SNV	1	A	G	159	160	99.38	0.49	UBRO_03916:c.164T>C	UBRO_03916:p.Leu55Pro
chr01 mapping	958651	SNV	1	G	A	96	96	100	0.39
chr01 mapping	958829	SNV	1	T	C	99	99	100	0.35
chr01 mapping	958834	SNV	1	T	A	100	100	100	0.34
chr01 mapping	958878	SNV	1	A	G	94	95	98.95	0.45
chr01 mapping	959018	SNV	1	G	A	100	100	100	0.48
chr01 mapping	959023	SNV	1	C	T	98	100	98	0.47
chr01 mapping	959029	SNV	1	G	C	103	103	100	0.5
chr01 mapping	959159	SNV	1	A	G	92	92	100	0.43
chr01 mapping	961559	SNV	1	A	C	90	91	98.9	0.45
chr01 mapping	961576	SNV	1	T	A	91	91	100	0.47
chr01 mapping	961644	SNV	1	G	T	99	101	98.02	0.45
chr01 mapping	961679	MNV	2	CA	TG	89	90	98.89	0.49
chr01 mapping	961716	SNV	1	G	A	96	98	97.96	0.49
chr01 mapping	961777	SNV	1	C	T	97	99	97.98	0.45
chr01 mapping	961805	SNV	1	T	C	94	94	100	0.44
chr01 mapping	961903	SNV	1	G	A	104	106	98.11	0.47
chr01 mapping	961928	SNV	1	A	G	106	108	98.15	0.44
chr01 mapping	961947	SNV	1	G	A	99	102	97.06	0.44	UBRO_20412:c.320C>T	UBRO_20412:p.Ser107Phe
chr01 mapping	962066	SNV	1	A	G	103	104	99.04	0.47	UBRO_20412:c.201T>C
chr01 mapping	962076	SNV	1	A	G	96	96	100	0.49	UBRO_20412:c.191T>C	UBRO_20412:p.Ile64Thr
chr01 mapping	962137	MNV	2	CA	TG	109	112	97.32	0.46	UBRO_20412:c.129_130delTGinsCA	UBRO_20412:p.Ile43_Ala44delinsIleThr
chr01 mapping	962163	SNV	1	C	A	113	115	98.26	0.46	UBRO_20412:c.104G>T	UBRO_20412:p.Cys35Phe
chr01 mapping	962173	SNV	1	A	G	112	113	99.12	0.46	UBRO_20412:c.94T>C	UBRO_20412:p.Cys32Arg
chr01 mapping	962357	SNV	1	T	C	93	94	98.94	0.39
chr01 mapping	963028	SNV	1	A	G	89	90	98.89	0.46
chr01 mapping	963084	SNV	1	T	C	92	94	97.87	0.48
chr01 mapping	963494	SNV	1	C	T	89	91	97.8	0.44
chr01 mapping	963942	SNV	1	C	G	98	98	100	0.39
chr01 mapping	964047	SNV	1	G	A	92	92	100	0.5
chr01 mapping	964116	SNV	1	C	T	88	90	97.78	0.48
chr01 mapping	964274	SNV	1	A	G	91	91	100	0.47
chr01 mapping	964355	SNV	1	G	T	100	100	100	0.44
chr01 mapping	964714	SNV	1	G	A	102	103	99.03	0.43
chr01 mapping	964876	SNV	1	G	A	91	93	97.85	0.37
chr01 mapping	966202	SNV	1	G	A	90	92	97.83	0.3
chr01 mapping	966216	SNV	1	G	A	92	93	98.92	0.26
chr01 mapping	966251	SNV	1	T	C	98	99	98.99	0.4
chr01 mapping	966273	MNV	2	GG	AA	95	95	100	0.44
chr01 mapping	966370	SNV	1	T	C	92	93	98.92	0.48
chr01 mapping	966374	SNV	1	A	G	92	92	100	0.47
chr01 mapping	966537	SNV	1	G	A	106	106	100	0.43
chr01 mapping	966576	SNV	1	G	A	107	107	100	0.39
chr01 mapping	966656	SNV	1	G	A	112	114	98.25	0.49
chr01 mapping	966720	SNV	1	A	G	121	122	99.18	0.47
chr01 mapping	966808	SNV	1	A	G	110	111	99.1	0.41
chr01 mapping	966818	SNV	1	G	A	118	118	100	0.41
chr01 mapping	966856	SNV	1	T	C	110	112	98.21	0.35
chr01 mapping	966941	SNV	1	A	G	107	107	100	0.41
chr01 mapping	970128	SNV	1	G	T	94	94	100	0.43
chr01 mapping	970621	SNV	1	T	G	156	156	100	0.4	UBRO_00849:c.2940A>C
chr01 mapping	971005	SNV	1	G	A	190	193	98.45	0.38	UBRO_00849:c.2556C>T
chr01 mapping	971199	SNV	1	C	T	192	193	99.48	0.46	UBRO_00849:c.2362G>A	UBRO_00849:p.Gly788Ser
chr01 mapping	975959	SNV	1	C	A	112	114	98.25	0.36	UBRO_00845:c.1456C>A	UBRO_00845:p.His486Asn
chr01 mapping	976136	SNV	1	G	A	95	98	96.94	0.44	UBRO_00845:c.1633G>A	UBRO_00845:p.Asp545Asn
chr01 mapping	979601	SNV	1	C	A	109	111	98.2	0.48	UBRO_00842:c.563G>T	UBRO_00842:p.Arg188Leu
chr01 mapping	979749	SNV	1	G	A	135	135	100	0.48	UBRO_00842:c.415C>T
chr01 mapping	982331	SNV	1	A	G	154	154	100	0.47	UBRO_00839:c.474T>C
chr01 mapping	982344	SNV	1	A	T	154	158	97.47	0.47	UBRO_00839:c.461T>A	UBRO_00839:p.Val154Glu
chr01 mapping	986698	SNV	1	C	T	146	146	100	0.42	UBRO_00832:c.117C>T
chr01 mapping	987074	SNV	1	G	A	148	149	99.33	0.48	UBRO_00832:c.493G>A	UBRO_00832:p.Ala165Thr
chr01 mapping	987265	SNV	1	A	G	152	153	99.35	0.43	UBRO_00832:c.684A>G
chr01 mapping	987844	SNV	1	A	G	168	168	100	0.47	UBRO_00832:c.1249+14A>G
chr01 mapping	988669	SNV	1	C	A	155	155	100	0.45	UBRO_00832:c.2013C>A	UBRO_00832:p.Asp671Glu
chr01 mapping	989338	SNV	1	T	C	164	166	98.8	0.44	UBRO_00832:c.2682T>C
chr01 mapping	990717	SNV	1	T	C	107	107	100	0.25	UBRO_00832:c.4061T>C	UBRO_00832:p.Ile1354Thr
chr01 mapping	991011	SNV	1	G	C	112	112	100	0.36	UBRO_00829:c.2172C>G
chr01 mapping	994348	SNV	1	C	T	141	142	99.3	0.45	UBRO_12331:c.360C>T
chr01 mapping	994453	SNV	1	G	A	157	157	100	0.44	UBRO_12331:c.465G>A
chr01 mapping	994984	SNV	1	G	A	148	151	98.01	0.48	UBRO_12331:c.996G>A
chr01 mapping	1004218	SNV	1	G	T	121	122	99.18	0.39	UBRO_03919:c.103-20G>T
chr01 mapping	1009511	SNV	1	T	C	131	131	100	0.35	UBRO_03923:c.576A>G
chr01 mapping	1009601	SNV	1	C	T	115	116	99.14	0.38	UBRO_03923:c.486G>A
chr01 mapping	1009891	SNV	1	A	G	169	170	99.41	0.45	UBRO_03923:c.201-5T>C
chr01 mapping	1010095	SNV	1	T	G	170	170	100	0.48	UBRO_03923:c.162A>C	UBRO_03923:p.Gln54His
chr01 mapping	1010166	SNV	1	T	A	157	159	98.74	0.42	UBRO_03923:c.91A>T	UBRO_03923:p.Thr31Ser
chr01 mapping	1010565	SNV	1	A	G	136	137	99.27	0.49
chr01 mapping	1016945	SNV	1	T	G	99	99	100	0.34
chr01 mapping	1017149	SNV	1	T	C	103	105	98.1	0.4	UBRO_20415:c.1365A>G
chr01 mapping	1017164	SNV	1	T	G	103	107	96.26	0.41	UBRO_20415:c.1350A>C
chr01 mapping	1017263	SNV	1	G	A	120	122	98.36	0.43	UBRO_20415:c.1251C>T
chr01 mapping	1017353	SNV	1	T	C	118	118	100	0.32	UBRO_20415:c.1161A>G
chr01 mapping	1017473	SNV	1	A	G	145	146	99.32	0.45	UBRO_20415:c.1101-60T>C
chr01 mapping	1017493	SNV	1	A	G	168	168	100	0.48	UBRO_20415:c.1100+47T>C
chr01 mapping	1017517	SNV	1	A	T	165	167	98.8	0.5	UBRO_20415:c.1100+23T>A
chr01 mapping	1017563	SNV	1	G	A	158	162	97.53	0.46	UBRO_20415:c.1077C>T
chr01 mapping	1017566	SNV	1	A	G	162	165	98.18	0.47	UBRO_20415:c.1074T>C
chr01 mapping	1017666	SNV	1	C	T	150	152	98.68	0.38	UBRO_20415:c.974G>A	UBRO_20415:p.Gly325Glu
chr01 mapping	1017707	SNV	1	T	G	143	143	100	0.39	UBRO_20415:c.933A>C
chr01 mapping	1017763	MNV	2	CA	TC	130	130	100	0.49	UBRO_20415:c.876_877delTGinsGA	UBRO_20415:p.Thr292_Val293delinsThrIle
chr01 mapping	1017902	SNV	1	T	C	143	143	100	0.38	UBRO_20415:c.846A>G
chr01 mapping	1017942	SNV	1	T	C	137	138	99.28	0.39	UBRO_20415:c.806A>G	UBRO_20415:p.Glu269Gly
chr01 mapping	1017976	SNV	1	T	A	135	136	99.26	0.38	UBRO_20415:c.772A>T	UBRO_20415:p.Thr258Ser
chr01 mapping	1017994	SNV	1	T	C	135	135	100	0.39	UBRO_20415:c.754A>G	UBRO_20415:p.Ile252Val
chr01 mapping	1018043	SNV	1	C	T	151	151	100	0.42	UBRO_20415:c.705G>A
chr01 mapping	1018070	SNV	1	A	G	138	138	100	0.49	UBRO_20415:c.678T>C
chr01 mapping	1018090	SNV	1	T	C	131	132	99.24	0.48	UBRO_20415:c.658A>G	UBRO_20415:p.Thr220Ala
chr01 mapping	1018203	SNV	1	G	A	131	132	99.24	0.42	UBRO_20415:c.545C>T	UBRO_20415:p.Thr182Ile
chr01 mapping	1018221	SNV	1	A	G	143	143	100	0.4	UBRO_20415:c.527T>C	UBRO_20415:p.Val176Ala
chr01 mapping	1018357	SNV	1	C	T	114	115	99.13	0.5	UBRO_20415:c.391G>A	UBRO_20415:p.Val131Ile
chr01 mapping	1018385	SNV	1	G	T	129	130	99.23	0.45	UBRO_20415:c.363C>A
chr01 mapping	1018475	SNV	1	G	A	164	165	99.39	0.48	UBRO_20415:c.273C>T
chr01 mapping	1018520	SNV	1	A	G	142	143	99.3	0.49	UBRO_20415:c.265-37T>C
chr01 mapping	1018573	SNV	1	G	A	131	135	97.04	0.48	UBRO_20415:c.264+45C>T
chr01 mapping	1018624	SNV	1	A	G	143	145	98.62	0.39	UBRO_20415:c.258T>C
chr01 mapping	1018626	SNV	1	C	T	143	145	98.62	0.39	UBRO_20415:c.256G>A	UBRO_20415:p.Ala86Thr
chr01 mapping	1018670	SNV	1	G	A	145	145	100	0.38	UBRO_20415:c.212C>T	UBRO_20415:p.Thr71Met
chr01 mapping	1031601	SNV	1	T	C	104	104	100	0.39
chr01 mapping	1031973	SNV	1	G	A	151	155	97.42	0.45	UBRO_00824:c.197G>A	UBRO_00824:p.Gly66Glu
chr01 mapping	1032860	SNV	1	G	C	156	156	100	0.46	UBRO_00824:c.1084G>C	UBRO_00824:p.Val362Leu
chr01 mapping	1033635	SNV	1	A	T	144	146	98.63	0.48	UBRO_00824:c.1859A>T	UBRO_00824:p.His620Leu
chr01 mapping	1033722	SNV	1	T	C	161	161	100	0.48	UBRO_00824:c.1946T>C	UBRO_00824:p.Val649Ala
chr01 mapping	1033777	SNV	1	C	T	174	176	98.86	0.45	UBRO_00824:c.2001C>T
chr01 mapping	1033996	SNV	1	C	T	162	164	98.78	0.47	UBRO_00824:c.2220C>T
chr01 mapping	1035267	SNV	1	A	G	135	136	99.26	0.43	UBRO_00824:c.3491A>G	UBRO_00824:p.Asp1164Gly
chr01 mapping	1035304	SNV	1	C	T	135	140	96.43	0.43	UBRO_00824:c.3528C>T
chr01 mapping	1035901	SNV	1	T	C	133	134	99.25	0.38	UBRO_00824:c.4125T>C
chr01 mapping	1036654	SNV	1	G	A	150	150	100	0.38	UBRO_00824:c.4878G>A
chr01 mapping	1038038	SNV	1	C	T	140	140	100	0.43	UBRO_00823:c.485G>A	UBRO_00823:p.Arg162Lys
chr01 mapping	1040509	SNV	1	C	T	175	175	100	0.42	UBRO_00821:c.583G>A	UBRO_00821:p.Ala195Thr
chr01 mapping	1041634	SNV	1	G	A	105	105	100	0.45
chr01 mapping	1041751	SNV	1	G	A	94	96	97.92	0.41
chr01 mapping	1042562	SNV	1	C	T	129	135	95.56	0.39	UBRO_20137:c.311C>T	UBRO_20137:p.Pro104Leu
chr01 mapping	1046707	SNV	1	T	A	125	125	100	0.46	UBRO_00818:c.525A>T
chr01 mapping	1049312	SNV	1	A	G	140	141	99.29	0.49	UBRO_00816:c.1180A>G	UBRO_00816:p.Ile394Val
chr01 mapping	1049767	SNV	1	G	T	104	104	100	0.38	UBRO_00816:c.1635G>T	UBRO_00816:p.Met545Ile
chr01 mapping	1050291	SNV	1	A	G	98	99	98.99	0.48	UBRO_00816:c.2159A>G	UBRO_00816:p.Asp720Gly
chr01 mapping	1050541	SNV	1	G	A	94	96	97.92	0.47	UBRO_00816:c.2409G>A
chr01 mapping	1052635	SNV	1	A	G	97	99	97.98	0.38
chr01 mapping	1052747	SNV	1	T	C	108	108	100	0.31
chr01 mapping	1052790	SNV	1	G	A	92	92	100	0.44
chr01 mapping	1052801	SNV	1	A	G	91	91	100	0.42
chr01 mapping	1058384	SNV	1	T	C	152	152	100	0.46	UBRO_00903:c.705T>C
chr01 mapping	1058906	SNV	1	C	T	117	119	98.32	0.44
chr01 mapping	1059436	SNV	1	T	C	95	95	100	0.42
chr01 mapping	1061007	MNV	2	AG	TA	113	115	98.26	0.39	UBRO_00902:c.807_808delCTinsTA	UBRO_00902:p.Ile269_Leu270delinsIleMet
chr01 mapping	1062959	SNV	1	A	G	169	170	99.41	0.49	UBRO_00901:c.2501T>C	UBRO_00901:p.Phe834Ser
chr01 mapping	1063237	SNV	1	G	A	168	170	98.82	0.47	UBRO_00901:c.2223C>T
chr01 mapping	1067953	SNV	1	G	T	157	158	99.37	0.49	UBRO_00899:c.1513G>T	UBRO_00899:p.Gly505Cys
chr01 mapping	1068333	SNV	1	G	T	103	104	99.04	0.16	UBRO_00899:c.1893G>T
chr01 mapping	1068336	SNV	1	G	A	99	99	100	0.16	UBRO_00899:c.1896G>A
chr01 mapping	1073224	SNV	1	C	T	89	90	98.89	0.44	UBRO_20140:c.392C>T	UBRO_20140:p.Thr131Met
chr01 mapping	1073318	SNV	1	A	G	92	92	100	0.49	UBRO_20140:c.486A>G
chr01 mapping	1073738	MNV	2	AC	GT	87	93	93.55	0.47	UBRO_20140:c.906_907delACinsGT	UBRO_20140:p.Arg302_Pro303delinsArgSer
chr01 mapping	1073743	SNV	1	T	C	139	139	100	0.49	UBRO_20140:c.911T>C	UBRO_20140:p.Leu304Pro
chr01 mapping	1076310	MNV	2	AG	CA	101	128	78.91	0.43
chr01 mapping	1076673	SNV	1	G	A	90	153	58.82	0.42
chr01 mapping	1076683	SNV	1	G	A	166	166	100	0.37
chr01 mapping	1076750	SNV	1	A	G	149	150	99.33	0.38
chr01 mapping	1077205	SNV	1	T	C	91	91	100	0.37
chr01 mapping	1077207	SNV	1	G	A	91	91	100	0.37
chr01 mapping	1077243	MNV	2	CA	TG	103	103	100	0.39
chr01 mapping	1077258	SNV	1	A	G	116	116	100	0.41
chr01 mapping	1077262	SNV	1	C	T	111	113	98.23	0.41
chr01 mapping	1077266	SNV	1	G	A	107	107	100	0.42
chr01 mapping	1077269	SNV	1	C	T	105	106	99.06	0.42
chr01 mapping	1077271	SNV	1	G	A	107	108	99.07	0.41
chr01 mapping	1077285	MNV	2	TG	CA	118	118	100	0.43
chr01 mapping	1077301	SNV	1	A	G	138	138	100	0.43
chr01 mapping	1077315	SNV	1	T	G	126	126	100	0.44
chr01 mapping	1077336	MNV	3	GCA	ATG	108	109	99.08	0.47
chr01 mapping	1077343	SNV	1	C	T	125	126	99.21	0.48
chr01 mapping	1077355	SNV	1	C	A	100	100	100	0.49
chr01 mapping	1077365	SNV	1	G	A	109	110	99.09	0.49
chr01 mapping	1077376	SNV	1	A	G	122	122	100	0.47
chr01 mapping	1077385	SNV	1	G	A	123	126	97.62	0.47
chr01 mapping	1077402	SNV	1	T	C	124	127	97.64	0.41
chr01 mapping	1077417	MNV	2	CT	TG	109	112	97.32	0.39
chr01 mapping	1077424	SNV	1	G	A	121	121	100	0.41
chr01 mapping	1077427	SNV	1	A	G	128	128	100	0.41
chr01 mapping	1077489	MNV	2	TG	CA	146	148	98.65	0.42
chr01 mapping	1077495	SNV	1	T	A	154	154	100	0.4
chr01 mapping	1077516	SNV	1	A	G	135	136	99.26	0.39
chr01 mapping	1077529	SNV	1	T	C	121	122	99.18	0.4
chr01 mapping	1077550	SNV	1	G	A	98	100	98	0.41
chr01 mapping	1077787	SNV	1	A	G	112	112	100	0.46	UBRO_20141:c.576T>C
chr01 mapping	1077792	MNV	2	GG	AA	108	111	97.3	0.45	UBRO_20141:c.570_571delCCinsTT	UBRO_20141:p.Asp190_His191delinsAspTyr
chr01 mapping	1077922	SNV	1	A	T	100	101	99.01	0.38	UBRO_20141:c.441T>A
chr01 mapping	1077940	SNV	1	T	G	104	104	100	0.38	UBRO_20141:c.423A>C
chr01 mapping	1077943	SNV	1	G	A	101	101	100	0.38	UBRO_20141:c.420C>T
chr01 mapping	1077947	SNV	1	T	C	104	104	100	0.38	UBRO_20141:c.416A>G	UBRO_20141:p.His139Arg
chr01 mapping	1077954	SNV	1	A	G	103	104	99.04	0.38	UBRO_20141:c.409T>C
chr01 mapping	1077967	SNV	1	A	C	99	99	100	0.37	UBRO_20141:c.396T>G
chr01 mapping	1079939	SNV	1	A	T	92	92	100	0.42
chr01 mapping	1079942	MNV	2	AG	CA	90	90	100	0.42
chr01 mapping	1081523	SNV	1	G	A	91	91	100	0.49
chr01 mapping	1081576	SNV	1	C	A	97	99	97.98	0.45
chr01 mapping	1081798	SNV	1	T	C	99	99	100	0.4
chr01 mapping	1081858	SNV	1	A	C	92	92	100	0.44
chr01 mapping	1081869	SNV	1	G	A	94	95	98.95	0.43
chr01 mapping	1082133	SNV	1	C	A	99	101	98.02	0.44	UBRO_03908:c.31C>A	UBRO_03908:p.Pro11Thr
chr01 mapping	1082136	SNV	1	G	A	94	97	96.91	0.46	UBRO_03908:c.34G>A	UBRO_03908:p.Ala12Thr
chr01 mapping	1082171	SNV	1	T	C	93	94	98.94	0.48	UBRO_03908:c.69T>C
chr01 mapping	1082177	SNV	1	C	G	97	99	97.98	0.49	UBRO_03908:c.75C>G
chr01 mapping	1082209	SNV	1	G	A	119	119	100	0.44	UBRO_03908:c.107G>A	UBRO_03908:p.Arg36Gln
chr01 mapping	1082212	SNV	1	A	G	120	120	100	0.47	UBRO_03908:c.110A>G	UBRO_03908:p.Glu37Gly
chr01 mapping	1082233	SNV	1	G	A	123	125	98.4	0.46	UBRO_03908:c.131G>A	UBRO_03908:p.Gly44Asp
chr01 mapping	1082271	SNV	1	G	T	130	130	100	0.48	UBRO_03908:c.169G>T	UBRO_03908:p.Asp57Tyr
chr01 mapping	1082497	SNV	1	G	A	111	116	95.69	0.47	UBRO_03908:c.313G>A	UBRO_03908:p.Gly105Ser
chr01 mapping	1082628	SNV	1	T	G	178	179	99.44	0.43	UBRO_03908:c.444T>G
chr01 mapping	1082873	SNV	1	A	G	171	172	99.42	0.44	UBRO_03908:c.689A>G	UBRO_03908:p.Asn230Ser
chr01 mapping	1083933	SNV	1	G	A	149	149	100	0.49	UBRO_03908:c.1749G>A
chr01 mapping	1084867	SNV	1	A	G	95	96	98.96	0.42	UBRO_03908:c.2683A>G	UBRO_03908:p.Ile895Val
chr01 mapping	1087518	SNV	1	A	G	143	143	100	0.44	UBRO_03905:c.679A>G	UBRO_03905:p.Ile227Val
chr01 mapping	1088323	SNV	1	G	A	100	100	100	0.48
chr01 mapping	1088807	SNV	1	A	G	94	94	100	0.43	UBRO_03904:c.79T>C	UBRO_03904:p.Cys27Arg
chr01 mapping	1089645	SNV	1	A	C	119	119	100	0.49	UBRO_03904:c.8-31T>G
chr01 mapping	1099665	SNV	1	T	C	144	144	100	0.46	UBRO_03898:c.960T>C
chr01 mapping	1100839	SNV	1	C	T	101	105	96.19	0.42
chr01 mapping	1101758	SNV	1	G	A	162	162	100	0.46	UBRO_03897:c.407G>A	UBRO_03897:p.Ser136Asn
chr01 mapping	1102437	SNV	1	T	C	168	168	100	0.43	UBRO_03897:c.1086T>C
chr01 mapping	1102482	SNV	1	T	C	160	160	100	0.47	UBRO_03897:c.1131T>C
chr01 mapping	1102672	SNV	1	G	T	150	152	98.68	0.47	UBRO_03897:c.1321G>T	UBRO_03897:p.Ala441Ser
chr01 mapping	1102809	SNV	1	G	A	151	153	98.69	0.49	UBRO_03897:c.1458G>A
chr01 mapping	1102857	SNV	1	C	T	159	160	99.38	0.48	UBRO_03897:c.1506C>T
chr01 mapping	1105483	SNV	1	G	A	112	113	99.12	0.47	UBRO_03895:c.1080G>A
chr01 mapping	1106257	SNV	1	A	G	124	124	100	0.42	UBRO_03895:c.1854A>G
chr01 mapping	1106336	SNV	1	C	G	103	103	100	0.44	UBRO_03895:c.1933C>G	UBRO_03895:p.His645Asp
chr01 mapping	1106524	SNV	1	A	G	118	118	100	0.42	UBRO_03895:c.2121A>G
chr01 mapping	1106621	SNV	1	G	A	125	125	100	0.37	UBRO_03895:c.2218G>A	UBRO_03895:p.Glu740Lys
chr01 mapping	1109005	SNV	1	G	A	199	200	99.5	0.5	UBRO_03865:c.1816G>A	UBRO_03865:p.Ala606Thr
chr01 mapping	1111853	SNV	1	C	T	104	104	100	0.49	UBRO_03861:c.2209G>A	UBRO_03861:p.Gly737Arg
chr01 mapping	1112878	SNV	1	T	C	119	120	99.17	0.49	UBRO_03861:c.1184A>G	UBRO_03861:p.Asp395Gly
chr01 mapping	1113202	SNV	1	A	C	128	128	100	0.46	UBRO_03861:c.860T>G	UBRO_03861:p.Leu287Arg
chr01 mapping	1113315	SNV	1	A	G	100	100	100	0.47	UBRO_03861:c.747T>C
chr01 mapping	1113410	SNV	1	T	G	111	111	100	0.48	UBRO_03861:c.652A>C	UBRO_03861:p.Thr218Pro
chr01 mapping	1113431	SNV	1	A	G	123	123	100	0.47	UBRO_03861:c.631T>C	UBRO_03861:p.Ser211Pro
chr01 mapping	1115328	SNV	1	G	A	100	100	100	0.48
chr01 mapping	1115352	SNV	1	T	C	105	105	100	0.48
chr01 mapping	1116071	SNV	1	G	A	90	90	100	0.44
chr01 mapping	1116272	SNV	1	G	A	107	107	100	0.5
chr01 mapping	1123205	SNV	1	C	G	124	124	100	0.34	UBRO_03833:c.3487G>C	UBRO_03833:p.Val1163Leu
chr01 mapping	1123882	SNV	1	C	T	115	115	100	0.48	UBRO_03833:c.2810G>A	UBRO_03833:p.Gly937Asp
chr01 mapping	1125047	SNV	1	C	T	163	163	100	0.48	UBRO_03833:c.1645G>A	UBRO_03833:p.Asp549Asn
chr01 mapping	1130315	SNV	1	C	G	129	130	99.23	0.49
chr01 mapping	1131905	SNV	1	G	A	114	117	97.44	0.44	UBRO_03835:c.138C>T
chr01 mapping	1135122	MNV	2	TG	CA	90	91	98.9	0.33
chr01 mapping	1135131	SNV	1	A	C	100	101	99.01	0.38
chr01 mapping	1135156	MNV	2	TG	CA	93	94	98.94	0.43
chr01 mapping	1135367	SNV	1	C	T	98	99	98.99	0.44
chr01 mapping	1135683	SNV	1	T	C	92	92	100	0.48
chr01 mapping	1140961	SNV	1	T	A	91	94	96.81	0.47
chr01 mapping	1141528	SNV	1	C	T	111	111	100	0.41	UBRO_03839:c.912G>A
chr01 mapping	1148095	SNV	1	A	T	123	125	98.4	0.44
chr01 mapping	1148428	SNV	1	C	G	130	131	99.24	0.46	UBRO_03844:c.12+8C>G
chr01 mapping	1148476	SNV	1	G	A	115	115	100	0.46	UBRO_03844:c.12+56G>A
chr01 mapping	1148515	SNV	1	C	T	100	100	100	0.49	UBRO_03844:c.13-25C>T
chr01 mapping	1148626	SNV	1	T	C	113	115	98.26	0.45	UBRO_03844:c.99T>C
chr01 mapping	1148849	SNV	1	T	G	111	111	100	0.48	UBRO_03844:c.322T>G	UBRO_03844:p.Phe108Val
chr01 mapping	1149347	SNV	1	C	T	112	112	100	0.46
chr01 mapping	1151271	SNV	1	T	C	121	121	100	0.47	UBRO_03846:c.1066A>G	UBRO_03846:p.Arg356Gly
chr01 mapping	1152144	SNV	1	C	T	110	111	99.1	0.43	UBRO_03846:c.193G>A	UBRO_03846:p.Val65Ile
chr01 mapping	1153063	SNV	1	A	G	131	132	99.24	0.4	UBRO_03847:c.1014T>C
chr01 mapping	1153310	SNV	1	C	A	151	154	98.05	0.39	UBRO_03847:c.767G>T	UBRO_03847:p.Arg256Leu
chr01 mapping	1156671	SNV	1	G	A	107	108	99.07	0.38	UBRO_03848:c.273G>A
chr01 mapping	1157197	SNV	1	A	C	160	160	100	0.44	UBRO_03848:c.799A>C	UBRO_03848:p.Thr267Pro
chr01 mapping	1161660	SNV	1	C	T	133	134	99.25	0.5
chr01 mapping	1163009	SNV	1	A	G	96	96	100	0.48	UBRO_03850:c.42+44T>C
chr01 mapping	1163035	SNV	1	T	G	97	99	97.98	0.49	UBRO_03850:c.42+18A>C
chr01 mapping	1172404	SNV	1	G	T	122	122	100	0.46
chr01 mapping	1174120	SNV	1	C	G	97	97	100	0.49
chr01 mapping	1175094	SNV	1	G	A	126	128	98.44	0.38	UBRO_03858:c.1557C>T
chr01 mapping	1178460	SNV	1	C	T	161	161	100	0.49	UBRO_03860:c.739G>A	UBRO_03860:p.Gly247Arg
chr01 mapping	1186877	SNV	1	C	A	129	131	98.47	0.43	UBRO_03829:c.366G>T
chr01 mapping	1189463	SNV	1	T	C	142	142	100	0.5	UBRO_03827:c.144T>C
chr01 mapping	1190532	SNV	1	T	G	102	103	99.03	0.41	UBRO_03827:c.1213T>G	UBRO_03827:p.Ser405Ala
chr01 mapping	1231087	SNV	1	T	C	115	115	100	0.42
chr01 mapping	1231095	SNV	1	C	T	113	114	99.12	0.44
chr01 mapping	1238173	SNV	1	T	C	122	124	98.39	0.31
chr01 mapping	1240180	SNV	1	G	A	147	147	100	0.45	UBRO_03805:c.383G>A	UBRO_03805:p.Gly128Asp
chr01 mapping	1240545	SNV	1	G	A	121	124	97.58	0.44	UBRO_03805:c.748G>A	UBRO_03805:p.Val250Ile
chr01 mapping	1243892	SNV	1	G	C	162	165	98.18	0.37	UBRO_03802:c.957G>C
chr01 mapping	1262503	SNV	1	C	G	99	100	99	0.44	UBRO_03793:c.1669G>C	UBRO_03793:p.Val557Leu
chr01 mapping	1284337	SNV	1	T	G	110	110	100	0.46
chr01 mapping	1295105	SNV	1	G	A	147	147	100	0.46	UBRO_03773:c.2205C>T
chr01 mapping	1307833	SNV	1	T	C	157	157	100	0.47	UBRO_03778:c.936A>G
chr01 mapping	1313123	SNV	1	G	C	148	149	99.33	0.49	UBRO_15112:c.2108G>C	UBRO_15112:p.Cys703Ser
chr01 mapping	1314252	SNV	1	C	T	141	141	100	0.45	UBRO_15112:c.3237C>T
chr01 mapping	1324713	SNV	1	T	C	130	131	99.24	0.43	UBRO_03786:c.158A>G	UBRO_03786:p.Glu53Gly
chr01 mapping	1324723	SNV	1	A	G	126	126	100	0.43	UBRO_03786:c.148T>C	UBRO_03786:p.Phe50Leu
chr01 mapping	1325327	SNV	1	G	C	143	144	99.31	0.45
chr01 mapping	1343730	SNV	1	C	A	148	153	96.73	0.44	UBRO_20156:c.172C>A	UBRO_20156:p.Pro58Thr
chr01 mapping	1345757	SNV	1	A	G	128	128	100	0.38
chr01 mapping	1346535	SNV	1	C	T	149	152	98.03	0.39
chr01 mapping	1349346	SNV	1	A	G	104	104	100	0.46
chr01 mapping	1354706	SNV	1	A	G	118	118	100	0.47
chr01 mapping	1354730	SNV	1	G	A	98	99	98.99	0.49
chr01 mapping	1357614	SNV	1	T	C	129	129	100	0.45
chr01 mapping	1362544	SNV	1	T	C	105	107	98.13	0.47
chr01 mapping	1362779	SNV	1	A	G	115	115	100	0.4	UBRO_03756:c.107A>G	UBRO_03756:p.Asp36Gly
chr01 mapping	1364331	SNV	1	C	G	128	128	100	0.36	UBRO_03756:c.1393C>G	UBRO_03756:p.Leu465Val
chr01 mapping	1365056	SNV	1	A	C	104	105	99.05	0.42	UBRO_03754:c.254A>C	UBRO_03754:p.Asn85Thr
chr01 mapping	1366753	SNV	1	G	C	132	134	98.51	0.49	UBRO_03753:c.3024C>G	UBRO_03753:p.Asp1008Glu
chr01 mapping	1390735	SNV	1	A	G	119	119	100	0.48
chr01 mapping	1391029	SNV	1	G	A	91	93	97.85	0.47
chr01 mapping	1400310	SNV	1	G	A	99	101	98.02	0.41
chr01 mapping	1417585	SNV	1	C	T	99	101	98.02	0.47	UBRO_03740:c.101C>T	UBRO_03740:p.Ala34Val
chr01 mapping	1421361	SNV	1	A	T	102	102	100	0.47
chr01 mapping	1423460	SNV	1	C	T	124	124	100	0.41
chr01 mapping	1424445	SNV	1	A	G	117	117	100	0.49	UBRO_03736:c.1398T>C
chr01 mapping	1424950	SNV	1	C	T	129	129	100	0.42	UBRO_03736:c.991G>A	UBRO_03736:p.Val331Ile
chr01 mapping	1425814	SNV	1	T	C	153	155	98.71	0.41	UBRO_03736:c.127A>G	UBRO_03736:p.Lys43Glu
chr01 mapping	1426352	SNV	1	C	T	130	131	99.24	0.49
chr01 mapping	1426808	SNV	1	G	A	103	104	99.04	0.43	UBRO_03735:c.310G>A	UBRO_03735:p.Ala104Thr
chr01 mapping	1436135	SNV	1	A	G	111	111	100	0.46
chr01 mapping	1436927	MNV	2	TG	CA	103	105	98.1	0.49	UBRO_20161:c.682_683delCAinsTG	UBRO_20161:p.His228Cys
chr01 mapping	1436936	SNV	1	C	T	104	104	100	0.5	UBRO_20161:c.674G>A	UBRO_20161:p.Cys225Tyr
chr01 mapping	1447044	SNV	1	C	T	145	147	98.64	0.49	UBRO_03730:c.997C>T	UBRO_03730:p.Pro333Ser
chr01 mapping	1447838	SNV	1	G	T	130	143	90.91	0.41	UBRO_03730:c.1791G>T	UBRO_03730:p.Gln597His
chr01 mapping	1448459	SNV	1	T	C	132	132	100	0.35	UBRO_03730:c.2412T>C
chr01 mapping	1449797	SNV	1	T	C	116	116	100	0.45	UBRO_03730:c.3750T>C
chr01 mapping	1451237	SNV	1	A	G	165	167	98.8	0.41	UBRO_20419:c.500+8A>G
chr01 mapping	1451731	SNV	1	C	G	160	160	100	0.46	UBRO_20419:c.826C>G	UBRO_20419:p.Pro276Ala
chr01 mapping	1451957	SNV	1	T	C	171	171	100	0.47	UBRO_20419:c.1052T>C	UBRO_20419:p.Leu351Pro
chr01 mapping	1458360	SNV	1	T	C	113	114	99.12	0.27
chr02 mapping	8179	SNV	1	T	A	151	153	98.69	0.49
chr02 mapping	9610	SNV	1	A	T	121	123	98.37	0.45	UBRO_12723:c.250T>A	UBRO_12723:p.Phe84Ile
chr02 mapping	12705	SNV	1	T	A	129	131	98.47	0.45
chr02 mapping	16754	SNV	1	T	G	154	155	99.35	0.48	UBRO_12726:c.1156A>C	UBRO_12726:p.Thr386Pro
chr02 mapping	25135	SNV	1	C	G	182	183	99.45	0.46	UBRO_12730:c.474C>G
chr02 mapping	28760	SNV	1	A	G	186	189	98.41	0.45	UBRO_12736:c.1971T>C
chr02 mapping	29423	SNV	1	G	A	137	138	99.28	0.45	UBRO_12736:c.1308C>T
chr02 mapping	32460	SNV	1	C	T	139	139	100	0.48	UBRO_12737:c.1176C>T
chr02 mapping	36500	SNV	1	C	T	176	179	98.32	0.44	UBRO_12740:c.970C>T	UBRO_12740:p.Pro324Ser
chr02 mapping	78002	SNV	1	G	A	169	174	97.13	0.41
chr02 mapping	78985	SNV	1	T	G	155	158	98.1	0.41	UBRO_12033:c.285T>G
chr02 mapping	82151	SNV	1	C	T	148	150	98.67	0.48	UBRO_12377:c.1735G>A	UBRO_12377:p.Gly579Ser
chr02 mapping	82491	SNV	1	T	C	182	184	98.91	0.44	UBRO_12377:c.1395A>G
chr02 mapping	170033	SNV	1	C	A	153	153	100	0.39	UBRO_04015:c.601G>T	UBRO_04015:p.Ala201Ser
chr02 mapping	611711	SNV	1	C	T	108	108	100	0.42
chr02 mapping	612358	SNV	1	G	A	183	186	98.39	0.48	UBRO_00739:c.2163C>T
chr02 mapping	613697	SNV	1	A	G	156	156	100	0.4	UBRO_00739:c.824T>C	UBRO_00739:p.Leu275Ser
chr02 mapping	616157	SNV	1	A	G	104	105	99.05	0.4
chr02 mapping	625140	SNV	1	A	G	152	154	98.7	0.47	UBRO_00733:c.93+43T>C
chr02 mapping	635145	SNV	1	A	G	164	165	99.39	0.41	UBRO_00731:c.1793A>G	UBRO_00731:p.Tyr598Cys
chr02 mapping	635249	SNV	1	C	A	140	143	97.9	0.49	UBRO_00731:c.1897C>A	UBRO_00731:p.Leu633Ile
chr02 mapping	636570	SNV	1	A	G	154	155	99.35	0.47
chr02 mapping	641205	SNV	1	T	A	99	100	99	0.44
chr02 mapping	645661	SNV	1	T	C	167	168	99.4	0.46	UBRO_00725:c.1478A>G	UBRO_00725:p.His493Arg
chr02 mapping	646425	SNV	1	T	C	159	159	100	0.48	UBRO_00725:c.714A>G
chr02 mapping	646670	SNV	1	T	C	178	181	98.34	0.46	UBRO_00725:c.469A>G	UBRO_00725:p.Lys157Glu
chr02 mapping	646809	SNV	1	C	T	163	166	98.19	0.48	UBRO_00725:c.330G>A
chr02 mapping	655623	SNV	1	T	A	103	104	99.04	0.33
chr02 mapping	674055	SNV	1	C	T	100	102	98.04	0.42
chr02 mapping	677143	SNV	1	G	A	124	125	99.2	0.46	UBRO_00713:c.88G>A	UBRO_00713:p.Val30Ile
chr02 mapping	678833	SNV	1	C	T	132	134	98.51	0.47	UBRO_00713:c.1778C>T	UBRO_00713:p.Ser593Leu
chr02 mapping	679549	SNV	1	G	A	121	124	97.58	0.49	UBRO_00713:c.2494G>A	UBRO_00713:p.Val832Ile
chr02 mapping	809269	SNV	1	A	G	175	175	100	0.37	UBRO_00654:c.1186T>C	UBRO_00654:p.Ser396Pro
chr02 mapping	810597	SNV	1	G	T	119	121	98.35	0.44
chr02 mapping	819841	SNV	1	C	T	90	92	97.83	0.46	UBRO_00651:c.897+64C>T
chr02 mapping	830831	SNV	1	C	T	108	111	97.3	0.49
chr02 mapping	830839	SNV	1	A	G	108	108	100	0.5
chr02 mapping	834773	SNV	1	T	C	118	118	100	0.47	UBRO_00645:c.1230-45T>C
chr02 mapping	841993	SNV	1	T	C	105	105	100	0.47
chr02 mapping	844978	SNV	1	G	A	100	101	99.01	0.41
chr02 mapping	846313	SNV	1	G	A	98	98	100	0.43
chr02 mapping	847961	SNV	1	T	A	95	95	100	0.47
chr02 mapping	848664	SNV	1	G	A	91	92	98.91	0.41
chr02 mapping	849752	SNV	1	G	A	92	92	100	0.41
chr02 mapping	852568	SNV	1	T	C	111	113	98.23	0.48
chr02 mapping	854753	SNV	1	A	G	98	98	100	0.36
chr02 mapping	858304	SNV	1	G	T	108	108	100	0.46
chr02 mapping	858632	SNV	1	T	C	105	106	99.06	0.44
chr02 mapping	862476	SNV	1	G	T	98	100	98	0.43
chr02 mapping	866037	SNV	1	C	T	125	128	97.66	0.5
chr02 mapping	871268	SNV	1	T	C	111	111	100	0.47
chr02 mapping	878660	SNV	1	T	C	90	90	100	0.49
chr02 mapping	880422	SNV	1	G	T	116	121	95.87	0.5	UBRO_00629:c.3+320C>A
chr02 mapping	891712	SNV	1	A	G	118	118	100	0.47
chr02 mapping	892372	SNV	1	A	G	107	107	100	0.41
chr02 mapping	897792	SNV	1	G	T	128	131	97.71	0.45	UBRO_00622:c.279C>A
chr02 mapping	901803	SNV	1	T	C	93	93	100	0.46
chr02 mapping	909153	SNV	1	C	T	124	126	98.41	0.49	UBRO_00614:c.1999G>A	UBRO_00614:p.Ala667Thr
chr02 mapping	926613	SNV	1	C	G	133	135	98.52	0.36
chr02 mapping	927689	SNV	1	G	C	98	98	100	0.45
chr02 mapping	930640	SNV	1	G	C	173	174	99.43	0.43
chr02 mapping	935065	SNV	1	G	A	187	191	97.91	0.48	UBRO_00601:c.602C>T	UBRO_00601:p.Pro201Leu
chr02 mapping	938273	SNV	1	T	A	104	106	98.11	0.38
chr02 mapping	942781	SNV	1	T	G	150	150	100	0.5
chr02 mapping	946210	SNV	1	C	T	127	128	99.22	0.43	UBRO_00597:c.176G>A	UBRO_00597:p.Gly59Asp
chr02 mapping	948035	SNV	1	A	C	91	91	100	0.49
chr02 mapping	979188	SNV	1	A	G	159	163	97.55	0.46	UBRO_00578:c.1726A>G	UBRO_00578:p.Ser576Gly
chr02 mapping	980566	SNV	1	A	C	96	98	97.96	0.44	UBRO_00578:c.3104A>C	UBRO_00578:p.Asn1035Thr
chr02 mapping	985353	SNV	1	C	T	141	142	99.3	0.5
chr02 mapping	986022	SNV	1	C	T	110	111	99.1	0.4	UBRO_00575:c.460C>T	UBRO_00575:p.Pro154Ser
chr02 mapping	987743	SNV	1	T	C	118	118	100	0.5	UBRO_00575:c.2181T>C
chr02 mapping	991286	SNV	1	G	T	127	129	98.45	0.48
chr02 mapping	1011773	SNV	1	T	C	128	129	99.22	0.49	UBRO_00561:c.153A>G
chr02 mapping	1014772	SNV	1	A	G	98	98	100	0.42
chr02 mapping	1016094	SNV	1	A	G	173	173	100	0.48	UBRO_20362:c.517T>C	UBRO_20362:p.Cys173Arg
chr02 mapping	1018278	SNV	1	C	T	116	117	99.15	0.45
chr02 mapping	1019447	SNV	1	T	C	133	133	100	0.45
chr02 mapping	1019646	SNV	1	C	G	139	139	100	0.49
chr02 mapping	1021445	SNV	1	G	A	148	149	99.33	0.5
chr02 mapping	1021858	SNV	1	T	C	125	126	99.21	0.4
chr02 mapping	1022209	SNV	1	G	A	133	134	99.25	0.36
chr02 mapping	1022267	SNV	1	C	T	160	161	99.38	0.36
chr02 mapping	1023726	SNV	1	G	A	89	103	86.41	0.49	UBRO_20366:c.996C>T
chr02 mapping	1026011	SNV	1	C	T	120	120	100	0.41	UBRO_20367:c.451G>A	UBRO_20367:p.Ala151Thr
chr02 mapping	1027434	SNV	1	A	G	94	95	98.95	0.36	UBRO_20368:c.877T>C	UBRO_20368:p.*293Arg
chr02 mapping	1027837	SNV	1	A	G	156	160	97.5	0.45	UBRO_20368:c.474T>C
chr02 mapping	1028326	SNV	1	C	A	195	197	98.98	0.37
chr02 mapping	1029171	SNV	1	G	A	127	129	98.45	0.49	UBRO_20369:c.487C>T	UBRO_20369:p.Arg163*
chr02 mapping	1029441	SNV	1	T	C	136	138	98.55	0.48	UBRO_20369:c.217A>G	UBRO_20369:p.Ile73Val
chr02 mapping	1029562	SNV	1	A	G	143	144	99.31	0.46	UBRO_20369:c.96T>C
chr02 mapping	1029788	SNV	1	A	G	141	141	100	0.5
chr02 mapping	1030317	SNV	1	T	A	134	136	98.53	0.48
chr02 mapping	1031174	SNV	1	C	T	148	151	98.01	0.47	UBRO_20370:c.175G>A	UBRO_20370:p.Asp59Asn
chr02 mapping	1031422	SNV	1	G	A	145	146	99.32	0.47
chr02 mapping	1031701	SNV	1	A	G	132	134	98.51	0.37
chr02 mapping	1034268	SNV	1	C	T	132	132	100	0.47	UBRO_20467:c.1666G>A	UBRO_20467:p.Val556Ile
chr02 mapping	1034398	SNV	1	A	G	102	102	100	0.45	UBRO_20467:c.1536T>C
chr02 mapping	1036923	SNV	1	G	C	103	103	100	0.48	UBRO_00556:c.226G>C	UBRO_00556:p.Glu76Gln
chr02 mapping	1038023	SNV	1	C	T	120	121	99.17	0.48	UBRO_00556:c.1326C>T
chr02 mapping	1039978	SNV	1	C	A	160	160	100	0.42	UBRO_00555:c.883G>T	UBRO_00555:p.Ala295Ser
chr02 mapping	1048451	SNV	1	A	G	144	145	99.31	0.49
chr02 mapping	1048820	SNV	1	A	T	145	146	99.32	0.5
chr02 mapping	1051668	SNV	1	G	C	143	143	100	0.41
chr02 mapping	1059389	SNV	1	C	G	119	119	100	0.47	UBRO_00547:c.219G>C
chr02 mapping	1073412	SNV	1	T	C	90	91	98.9	0.37	UBRO_20371:c.343A>G	UBRO_20371:p.Thr115Ala
chr02 mapping	1089224	SNV	1	T	C	137	137	100	0.42
chr02 mapping	1095680	SNV	1	G	A	177	180	98.33	0.42	UBRO_00528:c.1411C>T	UBRO_00528:p.Arg471Cys
chr02 mapping	1098517	SNV	1	A	G	99	99	100	0.34	UBRO_00526:c.470A>G	UBRO_00526:p.Tyr157Cys
chr02 mapping	1100058	SNV	1	T	C	107	107	100	0.45
chr02 mapping	1100061	SNV	1	C	T	104	105	99.05	0.44
chr02 mapping	1100083	SNV	1	C	T	98	98	100	0.46
chr02 mapping	1100502	SNV	1	A	G	104	104	100	0.48
chr02 mapping	1103475	SNV	1	A	G	99	99	100	0.46
chr02 mapping	1103615	SNV	1	G	A	98	98	100	0.48
chr02 mapping	1103909	SNV	1	A	G	96	97	98.97	0.32
chr02 mapping	1115032	SNV	1	A	G	134	134	100	0.47	UBRO_00520:c.2164A>G	UBRO_00520:p.Ile722Val
chr02 mapping	1116763	SNV	1	C	T	150	155	96.77	0.46	UBRO_00520:c.3895C>T	UBRO_00520:p.Pro1299Ser
chr02 mapping	1125205	SNV	1	G	C	154	154	100	0.44
chr02 mapping	1139632	SNV	1	G	C	101	101	100	0.5
chr02 mapping	1182469	SNV	1	C	A	161	164	98.17	0.48	UBRO_00487:c.169G>T	UBRO_00487:p.Gly57Cys
chr02 mapping	1182595	SNV	1	T	G	135	137	98.54	0.32	UBRO_00487:c.43A>C	UBRO_00487:p.Thr15Pro
chr02 mapping	1187939	SNV	1	C	T	115	119	96.64	0.47	UBRO_00483:c.18C>T
chr02 mapping	1188656	SNV	1	C	T	171	171	100	0.48	UBRO_00483:c.735C>T
chr02 mapping	1227621	SNV	1	A	G	100	101	99.01	0.48	UBRO_20472:c.451A>G	UBRO_20472:p.Thr151Ala
chr02 mapping	1234833	SNV	1	G	A	149	150	99.33	0.35	UBRO_00467:c.1713C>T
chr02 mapping	1241813	SNV	1	A	G	165	166	99.4	0.42	UBRO_00464:c.861A>G
chr02 mapping	1245635	SNV	1	G	A	136	139	97.84	0.41	UBRO_00462:c.1724C>T	UBRO_00462:p.Ala575Val
chr02 mapping	1256405	SNV	1	G	C	140	141	99.29	0.46
chr02 mapping	1257961	SNV	1	C	T	116	117	99.15	0.49	UBRO_00459:c.1086C>T
chr02 mapping	1262869	SNV	1	G	A	124	125	99.2	0.44	UBRO_00456:c.1359C>T
chr02 mapping	1306600	SNV	1	T	C	96	97	98.97	0.38	UBRO_00438:c.2508T>C
chr02 mapping	1306672	SNV	1	T	C	106	106	100	0.43	UBRO_00438:c.2580T>C
chr02 mapping	1311761	SNV	1	C	T	107	108	99.07	0.47
chr02 mapping	1323740	SNV	1	A	G	121	121	100	0.34
chr02 mapping	1421971	SNV	1	T	C	191	191	100	0.47	UBRO_00377:c.751A>G	UBRO_00377:p.Ser251Gly
chr02 mapping	1422426	SNV	1	A	G	178	180	98.89	0.49	UBRO_00377:c.296T>C	UBRO_00377:p.Ile99Thr
chr02 mapping	1422943	MNV	2	GT	AA	95	96	98.96	0.28
chr02 mapping	1439572	SNV	1	A	G	114	114	100	0.49
chr02 mapping	1466842	SNV	1	T	G	101	102	99.02	0.45
chr02 mapping	1467274	SNV	1	G	A	137	137	100	0.46	UBRO_20478:c.304C>T
chr02 mapping	1467303	SNV	1	T	G	136	136	100	0.43	UBRO_20478:c.275A>C	UBRO_20478:p.Asp92Ala
chr02 mapping	1467365	SNV	1	G	A	133	138	96.38	0.49	UBRO_20478:c.213C>T
chr02 mapping	1467417	SNV	1	G	A	136	137	99.27	0.46	UBRO_20478:c.161C>T	UBRO_20478:p.Ala54Val
chr02 mapping	1467764	SNV	1	A	G	124	127	97.64	0.5
chr02 mapping	1467866	SNV	1	C	T	110	111	99.1	0.48
chr02 mapping	1468114	SNV	1	A	C	108	108	100	0.43
chr02 mapping	1468135	SNV	1	C	T	110	110	100	0.4
chr02 mapping	1468188	SNV	1	T	C	115	116	99.14	0.5
chr02 mapping	1468294	SNV	1	G	T	136	138	98.55	0.48
chr02 mapping	1468414	SNV	1	A	G	127	127	100	0.46
chr02 mapping	1468823	SNV	1	T	C	104	104	100	0.37	UBRO_00351:c.31T>C	UBRO_00351:p.Ser11Pro
chr02 mapping	1468851	SNV	1	T	C	109	109	100	0.35	UBRO_00351:c.59T>C	UBRO_00351:p.Ile20Thr
chr02 mapping	1468960	SNV	1	G	A	126	129	97.67	0.43	UBRO_00351:c.168G>A
chr02 mapping	1469029	MNV	2	CA	AG	130	131	99.24	0.45	UBRO_00351:c.237_238delCAinsAG	UBRO_00351:p.Ile79_Asn80delinsIleAsp
chr02 mapping	1469717	SNV	1	C	T	137	138	99.28	0.41	UBRO_00351:c.925C>T	UBRO_00351:p.Leu309Phe
chr02 mapping	1470175	SNV	1	C	T	112	113	99.12	0.49	UBRO_00351:c.1324-31C>T
chr02 mapping	1470935	SNV	1	G	A	130	132	98.48	0.32
chr02 mapping	1471119	SNV	1	T	G	158	158	100	0.46
chr02 mapping	1471245	SNV	1	C	T	167	171	97.66	0.41	UBRO_00349:c.96C>T
chr02 mapping	1472371	SNV	1	A	T	105	105	100	0.45	UBRO_00348:c.75+35A>T
chr02 mapping	1476563	SNV	1	C	G	100	101	99.01	0.38
chr02 mapping	1479605	SNV	1	G	A	107	107	100	0.41	UBRO_00344:c.2216C>T	UBRO_00344:p.Ala739Val
chr02 mapping	1482499	SNV	1	G	A	112	113	99.12	0.46	UBRO_00342:c.101G>A	UBRO_00342:p.Arg34Lys
chr02 mapping	1483503	SNV	1	T	C	109	110	99.09	0.45	UBRO_00342:c.1105T>C
chr02 mapping	1485567	SNV	1	A	G	110	110	100	0.47
chr02 mapping	1497767	SNV	1	C	T	131	131	100	0.43
chr02 mapping	1498188	SNV	1	C	T	131	136	96.32	0.48	UBRO_00327:c.8C>T	UBRO_00327:p.Ala3Val
chr02 mapping	1506066	SNV	1	C	T	194	199	97.49	0.48	UBRO_00324:c.514C>T	UBRO_00324:p.Pro172Ser
chr02 mapping	1512235	SNV	1	G	A	181	185	97.84	0.46	UBRO_20480:c.1531G>A	UBRO_20480:p.Ala511Thr
chr02 mapping	1513142	SNV	1	A	G	119	119	100	0.48
chr02 mapping	1514345	SNV	1	C	T	123	125	98.4	0.37
chr02 mapping	1515710	SNV	1	T	A	118	118	100	0.42
chr02 mapping	1527930	SNV	1	A	G	105	106	99.06	0.44	UBRO_00314:c.16T>C	UBRO_00314:p.Ser6Pro
chr02 mapping	1587404	SNV	1	A	C	168	168	100	0.43	UBRO_00280:c.3450T>G	UBRO_00280:p.Phe1150Leu
chr02 mapping	1589171	SNV	1	A	G	160	160	100	0.47	UBRO_00280:c.1683T>C
chr02 mapping	1594971	SNV	1	A	G	153	154	99.35	0.5	UBRO_00282:c.1338A>G
chr02 mapping	1595245	SNV	1	G	T	125	126	99.21	0.34	UBRO_00282:c.1612G>T	UBRO_00282:p.Val538Phe
chr02 mapping	1595566	SNV	1	T	C	117	117	100	0.4	UBRO_00282:c.1933T>C	UBRO_00282:p.Ser645Pro
chr02 mapping	1595604	SNV	1	A	G	111	111	100	0.47	UBRO_00282:c.1971A>G
chr02 mapping	1632303	SNV	1	C	T	138	139	99.28	0.49	UBRO_00266:c.982C>T	UBRO_00266:p.Pro328Ser
chr02 mapping	1636942	SNV	1	A	C	125	126	99.21	0.42
chr02 mapping	1743415	SNV	1	T	C	120	121	99.17	0.5
chr02 mapping	1744201	SNV	1	T	C	133	136	97.79	0.48
chr02 mapping	1744375	SNV	1	C	T	149	150	99.33	0.42
chr02 mapping	1786293	SNV	1	A	G	125	125	100	0.48
chr02 mapping	1922682	SNV	1	A	G	96	96	100	0.41
chr02 mapping	1937996	SNV	1	A	G	132	135	97.78	0.42
chr02 mapping	1940575	SNV	1	C	T	116	118	98.31	0.44	UBRO_20053:c.788C>T	UBRO_20053:p.Ala263Val
chr02 mapping	1952779	SNV	1	T	A	116	122	95.08	0.48
chr02 mapping	1952781	SNV	1	T	A	116	122	95.08	0.45
chr02 mapping	1955977	SNV	1	G	A	94	95	98.95	0.48
chr02 mapping	1963663	SNV	1	C	T	116	116	100	0.49
chr02 mapping	1981164	SNV	1	G	T	135	136	99.26	0.48	UBRO_00073:c.771G>T
chr02 mapping	2044646	SNV	1	G	C	168	170	98.82	0.47	UBRO_00020:c.441C>G
chr02 mapping	2045578	SNV	1	G	A	146	146	100	0.43
chr02 mapping	2062628	SNV	1	A	G	118	119	99.16	0.41
chr02 mapping	2078333	SNV	1	A	G	92	92	100	0.41
chr02 mapping	2099678	SNV	1	A	G	168	168	100	0.5	UBRO_00048:c.236T>C	UBRO_00048:p.Val79Ala
chr03 mapping	151851	SNV	1	G	A	109	110	99.09	0.5
chr03 mapping	966732	SNV	1	C	T	108	108	100	0.45	UBRO_01672:c.710G>A	UBRO_01672:p.Arg237Gln
chr03 mapping	999596	SNV	1	C	T	93	97	95.88	0.49	UBRO_01688:c.30C>T
chr03 mapping	1026216	SNV	1	T	C	159	160	99.38	0.48	UBRO_01698:c.2409A>G
chr03 mapping	1026421	SNV	1	A	G	171	172	99.42	0.49	UBRO_01698:c.2204T>C	UBRO_01698:p.Val735Ala
chr03 mapping	1026558	SNV	1	G	A	161	162	99.38	0.48	UBRO_01698:c.2067C>T
chr03 mapping	1026816	SNV	1	T	C	163	164	99.39	0.44	UBRO_01698:c.1809A>G
chr03 mapping	1027017	SNV	1	G	A	176	178	98.88	0.39	UBRO_01698:c.1608C>T
chr03 mapping	1027811	SNV	1	T	C	156	157	99.36	0.49	UBRO_01698:c.814A>G	UBRO_01698:p.Ser272Gly
chr03 mapping	1027899	SNV	1	C	G	117	120	97.5	0.36	UBRO_01698:c.726G>C
chr03 mapping	1028137	SNV	1	C	T	125	125	100	0.48	UBRO_01698:c.488G>A	UBRO_01698:p.Ser163Asn
chr03 mapping	1030119	SNV	1	T	C	143	143	100	0.48	UBRO_01699:c.1201A>G	UBRO_01699:p.Thr401Ala
chr03 mapping	1030134	SNV	1	C	T	139	140	99.29	0.5	UBRO_01699:c.1186G>A	UBRO_01699:p.Ala396Thr
chr03 mapping	1030188	SNV	1	A	G	142	143	99.3	0.44	UBRO_01699:c.1132T>C
chr03 mapping	1030459	SNV	1	G	A	181	182	99.45	0.42	UBRO_01699:c.861C>T
chr03 mapping	1035413	SNV	1	T	G	121	122	99.18	0.34
chr03 mapping	1035435	SNV	1	T	C	114	116	98.28	0.4
chr03 mapping	1038029	SNV	1	C	T	155	157	98.73	0.48	UBRO_01701:c.710C>T	UBRO_01701:p.Thr237Ile
chr03 mapping	1038489	SNV	1	T	C	115	115	100	0.42	UBRO_01701:c.1117T>C	UBRO_01701:p.Ser373Pro
chr03 mapping	1038533	SNV	1	C	T	114	114	100	0.45	UBRO_01701:c.1161C>T
chr03 mapping	1038673	SNV	1	T	C	119	120	99.17	0.49	UBRO_01701:c.1301T>C	UBRO_01701:p.Val434Ala
chr03 mapping	1040815	SNV	1	C	T	96	96	100	0.31
chr03 mapping	1041366	SNV	1	C	T	95	96	98.96	0.45
chr03 mapping	1045359	SNV	1	G	A	115	115	100	0.35	UBRO_01706:c.3890C>T	UBRO_01706:p.Ser1297Leu
chr03 mapping	1047974	SNV	1	G	A	125	127	98.43	0.45	UBRO_01706:c.1275C>T
chr03 mapping	1049842	SNV	1	T	C	104	104	100	0.42
chr03 mapping	1053009	SNV	1	G	A	128	130	98.46	0.49	UBRO_01709:c.86C>T	UBRO_01709:p.Ser29Leu
chr03 mapping	1053430	SNV	1	T	A	114	116	98.28	0.44
chr03 mapping	1053563	SNV	1	C	G	98	98	100	0.38
chr03 mapping	1056396	SNV	1	G	A	136	137	99.27	0.38
chr03 mapping	1058105	SNV	1	G	C	163	167	97.6	0.45	UBRO_01714:c.990C>G	UBRO_01714:p.Phe330Leu
chr03 mapping	1058910	SNV	1	T	C	117	119	98.32	0.47	UBRO_01714:c.185A>G	UBRO_01714:p.Lys62Arg
chr03 mapping	1063235	SNV	1	T	C	185	186	99.46	0.47	UBRO_01716:c.1863A>G
chr03 mapping	1067130	SNV	1	T	G	176	176	100	0.48	UBRO_01717:c.945A>C
chr03 mapping	1068979	SNV	1	G	A	96	97	98.97	0.3
chr03 mapping	1069368	SNV	1	A	G	185	186	99.46	0.49	UBRO_01718:c.350A>G	UBRO_01718:p.Asp117Gly
chr03 mapping	1069498	SNV	1	C	A	181	183	98.91	0.43	UBRO_01718:c.480C>A
chr03 mapping	1072953	SNV	1	G	A	154	155	99.35	0.39	UBRO_01719:c.570C>T
chr03 mapping	1074245	SNV	1	G	T	108	109	99.08	0.36
chr03 mapping	1076298	SNV	1	T	C	131	131	100	0.5	UBRO_01721:c.320T>C	UBRO_01721:p.Leu107Pro
chr03 mapping	1077109	SNV	1	G	A	169	169	100	0.48	UBRO_01721:c.1131G>A
chr03 mapping	1086415	SNV	1	T	G	149	149	100	0.48	UBRO_01723:c.1103A>C	UBRO_01723:p.Lys368Thr
chr03 mapping	1087187	SNV	1	T	G	149	149	100	0.45	UBRO_01723:c.331A>C	UBRO_01723:p.Lys111Gln
chr03 mapping	1088187	SNV	1	C	T	97	99	97.98	0.41
chr03 mapping	1088341	SNV	1	C	T	90	90	100	0.43
chr03 mapping	1090828	SNV	1	G	A	91	95	95.79	0.42
chr03 mapping	1091781	SNV	1	T	C	107	108	99.07	0.41
chr03 mapping	1092311	SNV	1	C	T	100	100	100	0.39
chr03 mapping	1092463	SNV	1	C	T	91	93	97.85	0.38
chr03 mapping	1093958	SNV	1	C	T	107	107	100	0.37
chr03 mapping	1093982	SNV	1	T	C	98	99	98.99	0.36
chr03 mapping	1095496	SNV	1	C	T	150	151	99.34	0.45
chr03 mapping	1095725	SNV	1	G	C	137	138	99.28	0.45
chr03 mapping	1095862	SNV	1	C	G	121	122	99.18	0.39
chr03 mapping	1095899	SNV	1	T	C	122	122	100	0.37
chr03 mapping	1096410	SNV	1	C	T	150	150	100	0.46	UBRO_01725:c.72C>T
chr03 mapping	1097029	SNV	1	G	A	190	190	100	0.49	UBRO_01725:c.691G>A	UBRO_01725:p.Val231Ile
chr03 mapping	1097061	SNV	1	T	C	167	167	100	0.49	UBRO_01725:c.723T>C
chr03 mapping	1097607	SNV	1	T	C	97	98	98.98	0.37	UBRO_01725:c.1269T>C
chr03 mapping	1100696	SNV	1	C	G	93	94	98.94	0.47
chr03 mapping	1101032	MNV	2	TG	CC	87	90	96.67	0.36
chr03 mapping	1102625	SNV	1	T	C	107	107	100	0.45
chr03 mapping	1108097	SNV	1	C	A	108	116	93.1	0.5
chr03 mapping	1108855	SNV	1	A	G	134	135	99.26	0.44
chr03 mapping	1109240	SNV	1	C	T	147	148	99.32	0.43	UBRO_01729:c.35C>T	UBRO_01729:p.Ala12Val
chr03 mapping	1109663	SNV	1	A	G	130	130	100	0.49	UBRO_01729:c.458A>G	UBRO_01729:p.His153Arg
chr03 mapping	1110981	SNV	1	G	C	113	114	99.12	0.47
chr03 mapping	1111212	SNV	1	A	C	124	124	100	0.38	UBRO_01730:c.10A>C
chr03 mapping	1113862	SNV	1	G	A	180	185	97.3	0.45	UBRO_01731:c.405C>T
chr03 mapping	1114701	SNV	1	A	G	112	112	100	0.45
chr03 mapping	1114962	SNV	1	G	C	103	103	100	0.49
chr03 mapping	1115243	SNV	1	T	C	92	92	100	0.45
chr03 mapping	1116089	SNV	1	G	A	168	171	98.25	0.49	UBRO_01733:c.3881C>T	UBRO_01733:p.Pro1294Leu
chr03 mapping	1117797	SNV	1	C	T	147	147	100	0.49	UBRO_01733:c.2173G>A	UBRO_01733:p.Ala725Thr
chr03 mapping	1118478	SNV	1	T	C	165	165	100	0.47	UBRO_01733:c.1492A>G	UBRO_01733:p.Ser498Gly
chr03 mapping	1118915	SNV	1	A	G	171	171	100	0.45	UBRO_01733:c.1055T>C	UBRO_01733:p.Ile352Thr
chr03 mapping	1119793	SNV	1	C	T	143	143	100	0.5	UBRO_01733:c.177G>A
chr03 mapping	1120947	SNV	1	G	A	89	90	98.89	0.34
chr03 mapping	1120949	SNV	1	T	C	90	90	100	0.34
chr03 mapping	1121098	SNV	1	G	A	93	93	100	0.41
chr03 mapping	1121497	SNV	1	A	G	106	107	99.07	0.47
chr03 mapping	1121585	SNV	1	T	C	96	96	100	0.4
chr03 mapping	1122175	SNV	1	G	A	96	98	97.96	0.36
chr03 mapping	1123464	SNV	1	G	A	99	100	99	0.38
chr03 mapping	1124034	SNV	1	C	T	102	102	100	0.35
chr03 mapping	1124059	SNV	1	C	T	104	106	98.11	0.33
chr03 mapping	1125213	SNV	1	C	T	101	102	99.02	0.43
chr03 mapping	1127491	SNV	1	A	G	117	120	97.5	0.28	UBRO_01735:c.1925T>C	UBRO_01735:p.Val642Ala
chr03 mapping	1129044	SNV	1	G	T	156	158	98.73	0.49	UBRO_01735:c.372C>A	UBRO_01735:p.Asn124Lys
chr03 mapping	1129358	SNV	1	T	C	184	184	100	0.37	UBRO_01735:c.58A>G	UBRO_01735:p.Thr20Ala
chr03 mapping	1130319	SNV	1	G	A	100	101	99.01	0.43
chr03 mapping	1130387	SNV	1	C	T	110	111	99.1	0.5
chr03 mapping	1131118	SNV	1	G	A	100	100	100	0.48
chr03 mapping	1131549	SNV	1	A	G	129	129	100	0.4	UBRO_01737:c.23+27A>G
chr03 mapping	1132046	SNV	1	C	T	124	125	99.2	0.44
chr03 mapping	1134342	SNV	1	C	T	107	108	99.07	0.48	UBRO_01740:c.1141G>A	UBRO_01740:p.Gly381Ser
chr03 mapping	1134649	SNV	1	G	A	128	129	99.22	0.46	UBRO_01740:c.834C>T
chr03 mapping	1136432	SNV	1	T	C	142	143	99.3	0.5	UBRO_20360:c.61T>C	UBRO_20360:p.Cys21Arg
chr03 mapping	1136546	SNV	1	C	T	132	133	99.25	0.5	UBRO_20360:c.175C>T	UBRO_20360:p.Arg59Cys
chr03 mapping	1136692	SNV	1	A	G	133	135	98.52	0.42	UBRO_20360:c.313+8A>G
chr03 mapping	1137152	SNV	1	C	T	97	98	98.98	0.48	UBRO_20360:c.640C>T	UBRO_20360:p.Arg214*
chr03 mapping	1137356	SNV	1	G	A	146	150	97.33	0.32	UBRO_20360:c.764-26G>A
chr03 mapping	1137373	SNV	1	C	T	151	151	100	0.3	UBRO_20360:c.764-9C>T
chr03 mapping	1137690	SNV	1	C	G	92	92	100	0.35	UBRO_20360:c.993C>G
chr03 mapping	1137841	SNV	1	C	T	141	141	100	0.48	UBRO_20360:c.1144C>T	UBRO_20360:p.Pro382Ser
chr03 mapping	1138173	SNV	1	T	C	124	125	99.2	0.46	UBRO_20360:c.1476T>C
chr03 mapping	1138186	SNV	1	C	T	128	129	99.22	0.46	UBRO_20360:c.1489C>T	UBRO_20360:p.Arg497Cys
chr03 mapping	1138508	SNV	1	C	T	133	135	98.52	0.46
chr03 mapping	1138802	SNV	1	A	G	140	140	100	0.45
chr03 mapping	1138899	SNV	1	T	C	132	132	100	0.47
chr03 mapping	1138998	SNV	1	G	A	114	117	97.44	0.48
chr03 mapping	1139001	SNV	1	C	T	114	116	98.28	0.48
chr03 mapping	1139280	MNV	2	TG	CA	104	132	78.79	0.39
chr03 mapping	1139783	SNV	1	A	G	129	129	100	0.46
chr03 mapping	1140306	SNV	1	T	C	134	134	100	0.45	UBRO_20359:c.123T>C
chr03 mapping	1140629	SNV	1	T	C	145	145	100	0.48	UBRO_20359:c.446T>C	UBRO_20359:p.Val149Ala
chr03 mapping	1140672	SNV	1	T	C	123	124	99.19	0.39	UBRO_20359:c.489T>C
chr03 mapping	1142100	SNV	1	T	C	145	146	99.32	0.48	UBRO_01741:c.2938A>G	UBRO_01741:p.Thr980Ala
chr03 mapping	1148585	SNV	1	T	G	189	189	100	0.47	UBRO_01742:c.2316T>G
chr03 mapping	1149035	SNV	1	C	T	167	170	98.24	0.43	UBRO_01742:c.2766C>T
chr03 mapping	1151465	SNV	1	C	T	155	156	99.36	0.48	UBRO_01743:c.881G>A	UBRO_01743:p.Arg294Lys
chr03 mapping	1151814	SNV	1	A	G	174	175	99.43	0.47	UBRO_01743:c.532T>C	UBRO_01743:p.Cys178Arg
chr03 mapping	1152413	SNV	1	C	T	131	132	99.24	0.42
chr03 mapping	1156165	SNV	1	C	T	103	104	99.04	0.44
chr03 mapping	1159371	SNV	1	T	C	118	118	100	0.44
chr03 mapping	1159612	SNV	1	A	C	110	110	100	0.4
chr03 mapping	1161632	SNV	1	C	T	124	124	100	0.39	UBRO_01746:c.976G>A	UBRO_01746:p.Val326Met
chr03 mapping	1161717	SNV	1	G	A	132	135	97.78	0.41	UBRO_01746:c.891C>T
chr03 mapping	1162707	SNV	1	G	A	148	149	99.33	0.41
chr03 mapping	1164354	SNV	1	A	G	172	172	100	0.43	UBRO_01748:c.1394T>C	UBRO_01748:p.Val465Ala
chr03 mapping	1164842	SNV	1	T	G	168	168	100	0.4	UBRO_01748:c.906A>C
chr03 mapping	1166421	SNV	1	G	T	157	157	100	0.47
chr03 mapping	1166688	SNV	1	G	A	107	107	100	0.46
chr03 mapping	1169888	SNV	1	A	G	192	194	98.97	0.45	UBRO_01751:c.1878A>G
chr03 mapping	1170629	SNV	1	C	G	131	131	100	0.49	UBRO_01751:c.2619C>G	UBRO_01751:p.Asp873Glu
chr03 mapping	1172522	SNV	1	C	T	118	120	98.33	0.5	UBRO_20530:c.500C>T	UBRO_20530:p.Thr167Ile
chr03 mapping	1174023	SNV	1	G	A	107	108	99.07	0.49
chr03 mapping	1174045	SNV	1	T	C	99	99	100	0.47
chr03 mapping	1174418	SNV	1	C	A	118	119	99.16	0.45
chr03 mapping	1174557	SNV	1	T	C	106	106	100	0.48
chr03 mapping	1174573	SNV	1	A	G	110	110	100	0.48
chr03 mapping	1174779	SNV	1	T	C	130	132	98.48	0.4
chr03 mapping	1175136	SNV	1	T	C	127	128	99.22	0.45
chr03 mapping	1175141	SNV	1	T	C	127	127	100	0.45
chr03 mapping	1175582	SNV	1	G	A	93	93	100	0.49
chr03 mapping	1176014	SNV	1	C	G	114	114	100	0.41	UBRO_20531:c.1110G>C	UBRO_20531:p.Glu370Asp
chr03 mapping	1176134	SNV	1	G	A	106	106	100	0.46	UBRO_20531:c.990C>T
chr03 mapping	1176426	SNV	1	G	A	109	110	99.09	0.47	UBRO_20531:c.698C>T	UBRO_20531:p.Ser233Phe
chr03 mapping	1176628	SNV	1	T	G	105	105	100	0.45	UBRO_20531:c.496A>C	UBRO_20531:p.Asn166His
chr03 mapping	1176836	SNV	1	A	G	120	122	98.36	0.45	UBRO_20531:c.425+34T>C
chr03 mapping	1176856	SNV	1	A	G	122	122	100	0.5	UBRO_20531:c.425+14T>C
chr03 mapping	1176904	SNV	1	C	G	131	135	97.04	0.49	UBRO_20531:c.391G>C	UBRO_20531:p.Glu131Gln
chr03 mapping	1177122	SNV	1	C	T	118	121	97.52	0.48	UBRO_20531:c.182-9G>A
chr03 mapping	1177819	SNV	1	A	G	111	111	100	0.38
chr03 mapping	1178423	SNV	1	A	G	127	127	100	0.47	UBRO_20532:c.568T>C
chr03 mapping	1178527	SNV	1	A	G	105	105	100	0.39	UBRO_20532:c.464T>C	UBRO_20532:p.Phe155Ser
chr03 mapping	1178564	SNV	1	T	C	123	123	100	0.36	UBRO_20532:c.427A>G	UBRO_20532:p.Asn143Asp
chr03 mapping	1179343	SNV	1	T	C	119	120	99.17	0.47
chr03 mapping	1179585	SNV	1	A	G	111	112	99.11	0.46
chr03 mapping	1184221	SNV	1	G	A	108	109	99.08	0.49
chr03 mapping	1185968	SNV	1	C	T	111	111	100	0.47
chr03 mapping	1186858	SNV	1	C	T	89	90	98.89	0.38
chr03 mapping	1187342	SNV	1	T	C	96	97	98.97	0.4
chr03 mapping	1191270	SNV	1	G	A	92	94	97.87	0.45
chr03 mapping	1191800	SNV	1	A	G	94	95	98.95	0.49
chr03 mapping	1192972	SNV	1	C	T	171	177	96.61	0.41
chr03 mapping	1215262	SNV	1	C	T	129	131	98.47	0.41
chr03 mapping	1259957	SNV	1	C	T	137	141	97.16	0.45	UBRO_01778:c.3079G>A	UBRO_01778:p.Glu1027Lys
chr03 mapping	1260287	SNV	1	T	C	164	165	99.39	0.48	UBRO_01778:c.2749A>G	UBRO_01778:p.Asn917Asp
chr03 mapping	1263313	SNV	1	G	A	93	93	100	0.4
chr03 mapping	1295443	SNV	1	A	G	125	125	100	0.46	UBRO_01791:c.2217T>C
chr03 mapping	1322254	SNV	1	C	T	96	98	97.96	0.49
chr03 mapping	1393283	SNV	1	G	A	96	97	98.97	0.45
chr03 mapping	1393692	SNV	1	T	C	92	93	98.92	0.41
chr03 mapping	1397648	SNV	1	C	T	119	119	100	0.48
chr03 mapping	1403057	SNV	1	G	C	124	124	100	0.45
chr03 mapping	1444523	SNV	1	G	A	144	146	98.63	0.48	UBRO_01846:c.250G>A	UBRO_01846:p.Glu84Lys
chr03 mapping	1461909	SNV	1	C	T	137	137	100	0.48	UBRO_01852:c.650C>T	UBRO_01852:p.Ala217Val
chr03 mapping	1470291	SNV	1	T	G	112	112	100	0.29	UBRO_01856:c.778T>G	UBRO_01856:p.Ser260Ala
chr03 mapping	1546786	SNV	1	A	G	147	148	99.32	0.42	UBRO_01893:c.1154A>G	UBRO_01893:p.Gln385Arg
chr03 mapping	1555905	SNV	1	T	C	92	93	98.92	0.31
chr03 mapping	1559623	SNV	1	G	A	188	189	99.47	0.38	UBRO_01900:c.2522G>A	UBRO_01900:p.Gly841Asp
chr03 mapping	1561435	SNV	1	C	T	190	192	98.96	0.45	UBRO_01900:c.4334C>T	UBRO_01900:p.Pro1445Leu
chr03 mapping	1585402	SNV	1	G	A	93	95	97.89	0.41	UBRO_01911:c.2033C>T	UBRO_01911:p.Ala678Val
chr03 mapping	1686193	SNV	1	C	T	111	111	100	0.5
chr03 mapping	1703845	SNV	1	T	C	114	114	100	0.42	UBRO_01963:c.730A>G	UBRO_01963:p.Thr244Ala
chr03 mapping	1716081	SNV	1	A	C	89	91	97.8	0.47
chr03 mapping	1722205	SNV	1	C	A	160	164	97.56	0.46	UBRO_01975:c.143+36G>T
chr03 mapping	1723045	SNV	1	T	C	115	115	100	0.38
chr03 mapping	1723986	MNV	2	CC	TT	133	133	100	0.5	UBRO_01977:c.158_159delCCinsTT	UBRO_01977:p.Thr53Ile
chr03 mapping	1724088	SNV	1	G	A	141	142	99.3	0.47	UBRO_01977:c.260G>A	UBRO_01977:p.Ser87Asn
chr03 mapping	1724710	SNV	1	A	G	181	184	98.37	0.44	UBRO_01977:c.882A>G
chr03 mapping	1724806	SNV	1	T	G	169	170	99.41	0.46	UBRO_01977:c.978T>G
chr03 mapping	1724814	SNV	1	C	T	162	164	98.78	0.48	UBRO_01977:c.986C>T	UBRO_01977:p.Ser329Leu
chr03 mapping	1727275	SNV	1	A	G	184	184	100	0.49	UBRO_01979:c.414T>C
chr03 mapping	1743100	SNV	1	G	A	95	96	98.96	0.47	UBRO_01993:c.1771C>T	UBRO_01993:p.Pro591Ser
chr03 mapping	1744926	SNV	1	A	G	144	144	100	0.45
chr03 mapping	1746542	SNV	1	G	A	186	187	99.47	0.46	UBRO_01994:c.742C>T	UBRO_01994:p.His248Tyr
chr03 mapping	1766810	SNV	1	T	C	122	122	100	0.48	UBRO_02010:c.1624A>G	UBRO_02010:p.Ser542Gly
chr03 mapping	1789368	SNV	1	G	A	132	134	98.51	0.41	UBRO_02026:c.2111G>A	UBRO_02026:p.Ser704Asn
chr03 mapping	1860262	SNV	1	A	G	175	176	99.43	0.45	UBRO_02071:c.2718A>G
chr04 mapping	404535	SNV	1	T	C	155	155	100	0.48	UBRO_02319:c.1618A>G	UBRO_02319:p.Ile540Val
chr04 mapping	406819	SNV	1	G	A	148	148	100	0.45
chr04 mapping	446655	SNV	1	C	T	91	175	52	0.45
chr04 mapping	1520605	SNV	1	T	C	90	91	98.9	0.43	UBRO_02911:c.672T>C
chr04 mapping	1520708	SNV	1	T	C	96	97	98.97	0.41	UBRO_02911:c.706-36T>C
chr04 mapping	1520902	SNV	1	A	G	95	95	100	0.47
chr04 mapping	1527636	SNV	1	A	G	109	109	100	0.49
chr04 mapping	1544142	SNV	1	T	C	92	93	98.92	0.44	UBRO_02922:c.304A>G	UBRO_02922:p.Asn102Asp
chr04 mapping	1612747	SNV	1	A	G	105	105	100	0.42
chr04 mapping	1657537	SNV	1	A	G	127	128	99.22	0.33
chr04 mapping	1667572	SNV	1	A	G	129	129	100	0.49
chr04 mapping	1671714	SNV	1	A	G	115	115	100	0.49
chr04 mapping	1687455	SNV	1	T	C	124	125	99.2	0.5
chr04 mapping	1701810	SNV	1	C	T	166	169	98.22	0.45	UBRO_02948:c.1020C>T
chr05 mapping	160941	SNV	1	G	A	100	101	99.01	0.45
chr05 mapping	426872	SNV	1	T	C	153	157	97.45	0.48	UBRO_03176:c.65-100A>G
chr05 mapping	515296	SNV	1	C	T	114	114	100	0.4
chr05 mapping	534256	SNV	1	T	C	150	152	98.68	0.38	UBRO_03130:c.338A>G	UBRO_03130:p.Asp113Gly
chr05 mapping	539688	SNV	1	T	C	114	114	100	0.48
chr05 mapping	542820	SNV	1	G	A	112	112	100	0.46
chr05 mapping	737823	SNV	1	G	T	111	113	98.23	0.42	UBRO_03048:c.2410G>T	UBRO_03048:p.Val804Leu
chr05 mapping	738257	SNV	1	G	A	138	138	100	0.49
chr05 mapping	738775	SNV	1	T	C	124	126	98.41	0.49
chr05 mapping	739787	SNV	1	C	G	111	111	100	0.47	UBRO_03047:c.91C>G	UBRO_03047:p.Pro31Ala
chr05 mapping	740285	SNV	1	T	C	120	120	100	0.5	UBRO_03047:c.589T>C	UBRO_03047:p.Phe197Leu
chr05 mapping	740411	SNV	1	G	A	117	120	97.5	0.44	UBRO_03047:c.715G>A	UBRO_03047:p.Gly239Ser
chr05 mapping	752039	SNV	1	C	T	101	103	98.06	0.45	UBRO_03041:c.2923G>A	UBRO_03041:p.Val975Ile
chr05 mapping	760792	SNV	1	C	A	122	124	98.39	0.35
chr05 mapping	763840	SNV	1	A	G	162	163	99.39	0.43	UBRO_03037:c.2240A>G	UBRO_03037:p.His747Arg
chr05 mapping	782708	SNV	1	C	T	127	128	99.22	0.47
chr05 mapping	784028	SNV	1	A	G	136	137	99.27	0.38
chr06 mapping	249762	SNV	1	A	G	88	165	53.33	0.47
chr06 mapping	249769	SNV	1	C	T	93	169	55.03	0.46
chr07 mapping	435981	SNV	1	C	T	101	103	98.06	0.46	UBRO_04690:c.303G>A
chr07 mapping	583135	SNV	1	A	T	119	122	97.54	0.42
chr07 mapping	588448	SNV	1	G	A	106	106	100	0.38	UBRO_04633:c.171C>T
chr07 mapping	620690	SNV	1	G	A	118	119	99.16	0.34	UBRO_04624:c.6433G>A	UBRO_04624:p.Gly2145Arg
chr07 mapping	656144	SNV	1	G	A	152	153	99.35	0.41
chr07 mapping	656327	SNV	1	G	A	168	169	99.41	0.43
chr07 mapping	662583	SNV	1	T	C	189	195	96.92	0.44	UBRO_04604:c.1262A>G	UBRO_04604:p.Asn421Ser
chr07 mapping	662697	SNV	1	G	A	201	203	99.01	0.46	UBRO_04604:c.1148C>T	UBRO_04604:p.Ala383Val
chr07 mapping	663279	SNV	1	A	G	202	203	99.51	0.42	UBRO_04604:c.566T>C	UBRO_04604:p.Ile189Thr
chr07 mapping	664643	SNV	1	G	A	109	110	99.09	0.5
chr07 mapping	670549	SNV	1	T	C	139	140	99.29	0.46	UBRO_04601:c.1678T>C	UBRO_04601:p.Ser560Pro
chr07 mapping	677305	SNV	1	G	T	133	134	99.25	0.5
chr07 mapping	677882	SNV	1	G	A	92	92	100	0.18
chr07 mapping	837952	SNV	1	G	A	107	108	99.07	0.43	UBRO_04524:c.324-51G>A
chr07 mapping	847196	SNV	1	C	T	95	98	96.94	0.38	UBRO_04519:c.199G>A	UBRO_04519:p.Glu67Lys
chr07 mapping	866669	SNV	1	C	T	131	132	99.24	0.43	UBRO_04508:c.2311G>A	UBRO_04508:p.Val771Ile
chr08a mapping	42121	SNV	1	C	T	126	128	98.44	0.47
chr08a mapping	132149	SNV	1	G	A	107	107	100	0.45	UBRO_04912:c.608G>A	UBRO_04912:p.Gly203Asp
chr08a mapping	145642	SNV	1	C	T	115	115	100	0.48	UBRO_04960:c.1192G>A	UBRO_04960:p.Glu398Lys
chr08a mapping	145857	SNV	1	C	A	132	132	100	0.47	UBRO_04960:c.977G>T	UBRO_04960:p.Gly326Val
chr08a mapping	145931	SNV	1	C	T	138	140	98.57	0.44	UBRO_04960:c.903G>A
chr08a mapping	146104	SNV	1	T	C	143	143	100	0.44	UBRO_04960:c.730A>G	UBRO_04960:p.Ile244Val
chr08a mapping	148279	SNV	1	C	T	151	152	99.34	0.4
chr08a mapping	193595	SNV	1	G	A	114	119	95.8	0.4	UBRO_04981:c.1926C>T
chr08a mapping	194135	SNV	1	G	A	174	180	96.67	0.47	UBRO_04981:c.1386C>T
chr08a mapping	195654	SNV	1	T	C	123	123	100	0.49	UBRO_04981:c.3+5A>G
chr08a mapping	196369	SNV	1	A	G	137	139	98.56	0.42
chr08a mapping	196666	SNV	1	T	A	93	94	98.94	0.46
chr08a mapping	197145	SNV	1	T	C	107	107	100	0.5
chr08a mapping	197762	MNV	2	TG	CA	91	95	95.79	0.49
chr08a mapping	198549	SNV	1	T	C	112	112	100	0.48
chr08a mapping	198685	SNV	1	G	A	99	101	98.02	0.5
chr08a mapping	198695	SNV	1	C	T	103	104	99.04	0.5
chr08a mapping	199300	SNV	1	G	A	115	115	100	0.47	UBRO_20679:c.451G>A	UBRO_20679:p.Val151Ile
chr08a mapping	200291	SNV	1	G	A	95	97	97.94	0.47	UBRO_20679:c.1442G>A	UBRO_20679:p.Arg481Gln
chr08a mapping	200343	SNV	1	A	C	104	104	100	0.48	UBRO_20679:c.1494A>C	UBRO_20679:p.Lys498Asn
chr08a mapping	200488	SNV	1	A	G	98	98	100	0.47	UBRO_20679:c.1639A>G	UBRO_20679:p.Asn547Asp
chr08a mapping	200937	SNV	1	A	G	104	105	99.05	0.5	UBRO_20679:c.1959A>G
chr08a mapping	200968	SNV	1	C	A	108	108	100	0.45	UBRO_20679:c.1990C>A	UBRO_20679:p.His664Asn
chr08a mapping	201110	SNV	1	C	T	118	120	98.33	0.49	UBRO_20679:c.2132C>T	UBRO_20679:p.Ser711Leu
chr08a mapping	201283	SNV	1	G	A	128	129	99.22	0.48	UBRO_20679:c.2305G>A	UBRO_20679:p.Gly769Ser
chr08a mapping	201359	SNV	1	T	C	108	109	99.08	0.5	UBRO_20679:c.2381T>C	UBRO_20679:p.Leu794Pro
chr08a mapping	202357	SNV	1	C	A	113	113	100	0.27
chr08a mapping	202957	SNV	1	G	A	124	126	98.41	0.45
chr08a mapping	203121	SNV	1	G	A	138	138	100	0.49	UBRO_04983:c.164G>A	UBRO_04983:p.Arg55Gln
chr08a mapping	205766	SNV	1	T	C	150	151	99.34	0.43	UBRO_04983:c.2809T>C	UBRO_04983:p.Ser937Pro
chr08a mapping	208283	SNV	1	A	T	93	94	98.94	0.39
chr08a mapping	208885	SNV	1	G	A	131	134	97.76	0.35
chr08a mapping	209216	SNV	1	T	C	110	111	99.1	0.45
chr08a mapping	210053	SNV	1	A	G	108	108	100	0.48
chr08a mapping	210058	SNV	1	G	A	111	111	100	0.48
chr08a mapping	210063	SNV	1	G	A	107	107	100	0.47
chr08a mapping	210376	SNV	1	A	G	104	104	100	0.44
chr08a mapping	213398	SNV	1	C	A	102	103	99.03	0.39
chr08a mapping	214608	SNV	1	A	T	117	120	97.5	0.42	UBRO_04987:c.577A>T	UBRO_04987:p.Thr193Ser
chr08a mapping	215627	SNV	1	C	G	113	113	100	0.46
chr08a mapping	247572	SNV	1	G	A	101	101	100	0.41	UBRO_20684:c.130C>T	UBRO_20684:p.Leu44Phe
chr09 mapping	301670	SNV	1	G	A	116	116	100	0.49
chr09 mapping	638269	SNV	1	C	A	178	178	100	0.49	UBRO_08439:c.968G>T	UBRO_08439:p.Gly323Val
chr10 mapping	3634	SNV	1	G	T	170	170	100	0.45	UBRO_05259:c.370C>A
chr10 mapping	45153	SNV	1	G	T	144	145	99.31	0.42	UBRO_05289:c.1435C>A	UBRO_05289:p.Pro479Thr
chr10 mapping	48994	SNV	1	G	T	179	181	98.9	0.43	UBRO_05287:c.1533C>A	UBRO_05287:p.Ser511Arg
chr10 mapping	49096	SNV	1	A	G	178	178	100	0.39	UBRO_05287:c.1431T>C
chr10 mapping	51703	SNV	1	C	T	104	108	96.3	0.39
chr10 mapping	51960	SNV	1	T	C	104	105	99.05	0.47
chr10 mapping	54945	SNV	1	A	G	103	105	98.1	0.42	UBRO_05282:c.160A>G	UBRO_05282:p.Asn54Asp
chr10 mapping	55785	SNV	1	A	G	146	147	99.32	0.5	UBRO_05282:c.1000A>G	UBRO_05282:p.Thr334Ala
chr10 mapping	56339	SNV	1	A	G	116	116	100	0.42	UBRO_05282:c.1554A>G
chr10 mapping	57365	SNV	1	C	G	119	119	100	0.45	UBRO_05282:c.2580C>G	UBRO_05282:p.Phe860Leu
chr10 mapping	106863	SNV	1	C	T	120	120	100	0.42	UBRO_05296:c.2562C>T
chr10 mapping	153175	SNV	1	C	G	129	129	100	0.42
chr10 mapping	170897	MNV	2	AC	TT	91	93	97.85	0.42	UBRO_20758:c.333_334delGTinsAA	UBRO_20758:p.Val111_Leu112delinsValMet
chr10 mapping	259570	SNV	1	A	G	151	154	98.05	0.49	UBRO_05366:c.2912T>C	UBRO_05366:p.Leu971Pro
chr12 mapping	22252	SNV	1	T	C	94	113	83.19	0.38
chr12 mapping	22740	SNV	1	T	C	134	134	100	0.44
chr12 mapping	23083	SNV	1	C	T	149	151	98.68	0.43	UBRO_06172:c.46C>T	UBRO_06172:p.Leu16Phe
chr12 mapping	29321	SNV	1	G	T	126	126	100	0.4
chr13 mapping	261409	SNV	1	G	T	140	149	93.96	0.48	UBRO_06844:c.1774G>T	UBRO_06844:p.Gly592Cys
chr13 mapping	261756	SNV	1	G	A	201	202	99.5	0.41	UBRO_06844:c.2121G>A
chr13 mapping	266498	SNV	1	A	G	120	120	100	0.44	UBRO_06846:c.186A>G
chr13 mapping	268749	SNV	1	G	T	112	112	100	0.43
chr15 mapping	47875	SNV	1	G	T	157	158	99.37	0.48
chr15 mapping	72575	SNV	1	T	G	107	109	98.17	0.49	UBRO_06134:c.1297T>G	UBRO_06134:p.Phe433Val
chr15 mapping	87045	SNV	1	G	A	90	175	51.43	0.37
chr15 mapping	87050	MNV	2	AA	TT	87	169	51.48	0.36
chr15 mapping	100434	SNV	1	G	A	103	103	100	0.44
chr15 mapping	118737	SNV	1	T	A	151	153	98.69	0.48	UBRO_06123:c.525A>T
chr15 mapping	131528	SNV	1	G	A	185	190	97.37	0.44	UBRO_06116:c.1727C>T	UBRO_06116:p.Thr576Met
chr15 mapping	133132	SNV	1	A	G	192	192	100	0.46	UBRO_06116:c.123T>C
chr15 mapping	168450	SNV	1	C	T	101	103	98.06	0.46	UBRO_13428:c.211G>A	UBRO_13428:p.Asp71Asn
chr15 mapping	172876	SNV	1	C	T	147	148	99.32	0.46	UBRO_06099:c.632G>A	UBRO_06099:p.Gly211Glu
chr15 mapping	172878	SNV	1	C	T	149	149	100	0.46	UBRO_06099:c.630G>A
chr15 mapping	193894	SNV	1	G	A	96	96	100	0.46
chr15 mapping	197187	SNV	1	C	T	119	119	100	0.45
chr15 mapping	226002	SNV	1	A	G	98	99	98.99	0.49
chr15 mapping	239511	SNV	1	T	C	132	132	100	0.47
chr15 mapping	275996	SNV	1	G	T	140	144	97.22	0.48	UBRO_06059:c.455G>T	UBRO_06059:p.Ser152Ile
chr15 mapping	291416	SNV	1	A	C	90	90	100	0.45
chr15 mapping	298202	SNV	1	G	C	107	107	100	0.47	UBRO_06047:c.1233G>C	UBRO_06047:p.Trp411Cys
chr15 mapping	317757	SNV	1	T	C	101	102	99.02	0.47
chr15 mapping	318169	SNV	1	G	C	100	100	100	0.48
chr15 mapping	318396	SNV	1	A	G	113	113	100	0.44
chr15 mapping	319004	SNV	1	G	A	90	91	98.9	0.4
chr15 mapping	393567	SNV	1	G	A	101	103	98.06	0.45	UBRO_06002:c.670C>T	UBRO_06002:p.Pro224Ser
chr15 mapping	396768	SNV	1	G	A	105	106	99.06	0.4	UBRO_06000:c.468C>T
chr15 mapping	398726	SNV	1	T	C	119	119	100	0.47	UBRO_05999:c.801T>C
chr15 mapping	398760	SNV	1	A	G	113	113	100	0.44	UBRO_05999:c.835A>G	UBRO_05999:p.Ser279Gly
chr15 mapping	398824	SNV	1	A	G	124	124	100	0.44	UBRO_05999:c.899A>G	UBRO_05999:p.Asp300Gly
chr15 mapping	398977	SNV	1	C	T	97	97	100	0.46
chr15 mapping	400023	SNV	1	G	A	105	105	100	0.5	UBRO_05998:c.471C>T
chr15 mapping	402474	SNV	1	A	G	93	93	100	0.4
chr15 mapping	402575	SNV	1	C	A	91	91	100	0.47
chr15 mapping	403370	SNV	1	A	G	143	143	100	0.5	UBRO_20849:c.79-32T>C
chr15 mapping	403778	SNV	1	G	T	135	136	99.26	0.48
chr15 mapping	404951	SNV	1	A	G	126	127	99.21	0.45
chr15 mapping	405162	SNV	1	T	C	146	148	98.65	0.45	UBRO_05992:c.57T>C
chr15 mapping	437225	SNV	1	G	C	92	173	53.18	0.5
chr17 mapping	70974	SNV	1	A	G	164	165	99.39	0.42	UBRO_07497:c.4355T>C	UBRO_07497:p.Met1452Thr
chr17 mapping	71805	SNV	1	T	C	99	99	100	0.47	UBRO_07497:c.3524A>G	UBRO_07497:p.His1175Arg
chr17 mapping	71821	SNV	1	C	G	102	103	99.03	0.48	UBRO_07497:c.3508G>C	UBRO_07497:p.Ala1170Pro
chr17 mapping	72344	SNV	1	A	G	99	99	100	0.49	UBRO_07497:c.2985T>C
chr17 mapping	72764	SNV	1	G	C	134	136	98.53	0.37	UBRO_07497:c.2565C>G
chr17 mapping	73379	SNV	1	C	T	156	157	99.36	0.46	UBRO_07497:c.1950G>A
chr17 mapping	81804	SNV	1	G	A	93	94	98.94	0.44
chr17 mapping	82412	SNV	1	C	T	106	107	99.07	0.42
chr17 mapping	82763	SNV	1	A	G	105	106	99.06	0.37	UBRO_07493:c.171+85A>G
chr17 mapping	87742	SNV	1	C	T	144	150	96	0.41	UBRO_07489:c.1456C>T	UBRO_07489:p.Pro486Ser
chr17 mapping	98053	SNV	1	T	C	113	113	100	0.42	UBRO_07482:c.198A>G
chr17 mapping	319107	SNV	1	T	C	155	156	99.36	0.47	UBRO_07324:c.2457T>C
chr18 mapping	510800	SNV	1	T	C	111	192	57.81	0.4
chr18 mapping	510807	MNV	2	TG	CA	106	183	57.92	0.4
chr18 mapping	510822	MNV	2	TG	CC	101	178	56.74	0.38
chr18 mapping	510837	SNV	1	T	C	105	181	58.01	0.36
chr18 mapping	510851	MNV	2	TG	CA	107	182	58.79	0.34
chr19 mapping	512441	SNV	1	A	G	135	136	99.26	0.48	UBRO_07222:c.1755A>G
chr19 mapping	515947	SNV	1	T	C	134	134	100	0.44	UBRO_07222:c.5261T>C	UBRO_07222:p.Val1754Ala
chr19 mapping	519172	SNV	1	G	T	92	94	97.87	0.4	UBRO_07233:c.776G>T	UBRO_07233:p.Ser259Ile
chr19 mapping	519747	SNV	1	T	C	132	133	99.25	0.48	UBRO_07233:c.981-57T>C
chr19 mapping	520236	SNV	1	G	A	115	117	98.29	0.45	UBRO_07233:c.1413G>A
chr19 mapping	593361	SNV	1	T	C	187	187	100	0.49	UBRO_07258:c.2784T>C
chr20 mapping	807	SNV	1	G	C	124	126	98.41	0.42
chr20 mapping	862	SNV	1	T	A	110	112	98.21	0.49
chr20 mapping	1048	SNV	1	G	A	91	93	97.85	0.47
chr20 mapping	1154	SNV	1	G	A	116	116	100	0.48
chr20 mapping	1242	SNV	1	A	G	120	121	99.17	0.5
chr20 mapping	1566	SNV	1	C	T	106	108	98.15	0.48
chr20 mapping	1606	SNV	1	T	C	107	107	100	0.4
chr20 mapping	3660	SNV	1	A	G	187	188	99.47	0.47	UBRO_07802:c.1234A>G	UBRO_07802:p.Ile412Val
chr20 mapping	4099	SNV	1	T	C	201	202	99.5	0.46	UBRO_07802:c.1673T>C	UBRO_07802:p.Val558Ala
chr20 mapping	25239	SNV	1	G	T	116	200	58	0.48
chr20 mapping	25249	SNV	1	T	C	99	182	54.4	0.45
chr20 mapping	25441	SNV	1	G	A	103	184	55.98	0.48
chr20 mapping	25452	MNV	2	TG	CA	90	173	52.02	0.5
chr20 mapping	25788	SNV	1	A	T	88	172	51.16	0.49
chr20 mapping	32465	SNV	1	G	A	129	130	99.23	0.49	UBRO_07817:c.215C>T	UBRO_07817:p.Thr72Ile
chr20 mapping	33906	SNV	1	C	T	113	115	98.26	0.39	UBRO_07818:c.158-38G>A
chr21 mapping	376144	SNV	1	A	G	152	154	98.7	0.47	UBRO_08658:c.2145T>C
chr21 mapping	377227	SNV	1	A	G	160	160	100	0.48	UBRO_08658:c.1062T>C
chr21 mapping	378358	SNV	1	A	G	133	134	99.25	0.36
chr21 mapping	397008	SNV	1	A	G	108	108	100	0.47
chr21 mapping	407873	SNV	1	A	G	108	109	99.08	0.45	UBRO_08679:c.408A>G
chr21 mapping	408061	SNV	1	G	T	122	123	99.19	0.37	UBRO_08679:c.596G>T	UBRO_08679:p.Gly199Val
chr21 mapping	416964	SNV	1	G	A	166	175	94.86	0.48
chr21 mapping	416993	SNV	1	G	A	174	175	99.43	0.49
chr21 mapping	444570	SNV	1	G	A	171	171	100	0.45	UBRO_08696:c.2023G>A	UBRO_08696:p.Gly675Arg
chr21 mapping	463540	SNV	1	C	A	130	131	99.24	0.35
chr21 mapping	466510	SNV	1	T	C	199	200	99.5	0.46	UBRO_08708:c.2106T>C
chr21 mapping	470118	SNV	1	C	T	146	147	99.32	0.35	UBRO_08713:c.980-47G>A
chr21 mapping	472860	SNV	1	C	T	151	154	98.05	0.48	UBRO_08711:c.84C>T
chr22 mapping	169317	SNV	1	T	G	114	114	100	0.46
chr22 mapping	215304	SNV	1	G	A	110	111	99.1	0.48
chr22 mapping	222550	SNV	1	C	A	100	101	99.01	0.46
chr22 mapping	222804	SNV	1	G	A	108	109	99.08	0.42
chr22 mapping	226369	SNV	1	G	A	111	112	99.11	0.48
chr22 mapping	227105	SNV	1	C	T	109	110	99.09	0.46	UBRO_08817:c.158+113C>T
chr22 mapping	227147	SNV	1	G	A	113	113	100	0.45	UBRO_08817:c.158+155G>A
chr22 mapping	227370	SNV	1	T	C	135	136	99.26	0.46	UBRO_08817:c.158+378T>C
chr22 mapping	227404	SNV	1	T	C	125	125	100	0.43	UBRO_08817:c.159-345T>C
chr22 mapping	227613	SNV	1	A	C	125	126	99.21	0.42	UBRO_08817:c.159-136A>C
chr22 mapping	227645	SNV	1	T	G	120	120	100	0.42	UBRO_08817:c.159-104T>G
chr22 mapping	228874	SNV	1	C	T	90	92	97.83	0.48	UBRO_08818:c.434G>A	UBRO_08818:p.Gly145Glu
chr22 mapping	234498	SNV	1	G	A	108	108	100	0.44
chr22 mapping	269847	SNV	1	A	C	151	152	99.34	0.45	UBRO_08837:c.2113T>G	UBRO_08837:p.Ser705Ala
chr22 mapping	284102	SNV	1	C	T	125	126	99.21	0.46	UBRO_08847:c.55G>A	UBRO_08847:p.Val19Ile
chr22 mapping	284124	SNV	1	G	A	120	122	98.36	0.45	UBRO_08847:c.33C>T
chr22 mapping	291956	SNV	1	C	T	109	109	100	0.36	UBRO_08850:c.101C>T	UBRO_08850:p.Ser34Leu
chr22 mapping	348137	SNV	1	G	A	105	109	96.33	0.32
chr22 mapping	357341	SNV	1	C	T	159	162	98.15	0.47	UBRO_08870:c.3705G>A
chr22 mapping	358569	SNV	1	C	T	139	142	97.89	0.4	UBRO_08870:c.2477G>A	UBRO_08870:p.Arg826His
chr22 mapping	363227	SNV	1	G	A	127	128	99.22	0.49
chr22 mapping	364020	SNV	1	T	C	183	185	98.92	0.47	UBRO_08871:c.302T>C	UBRO_08871:p.Val101Ala
chr22 mapping	364728	SNV	1	C	T	163	163	100	0.47	UBRO_08871:c.1010C>T	UBRO_08871:p.Pro337Leu
chr22 mapping	368243	SNV	1	T	C	150	150	100	0.42	UBRO_08873:c.1113T>C
chr22 mapping	380376	SNV	1	C	G	117	118	99.15	0.47
chr22 mapping	391262	SNV	1	C	T	133	133	100	0.47
chr22 mapping	394832	SNV	1	C	G	101	101	100	0.42
chr23 mapping	31438	SNV	1	A	T	152	154	98.7	0.49
chr23 mapping	33506	SNV	1	C	T	128	128	100	0.37
chr23 mapping	34153	SNV	1	G	A	126	127	99.21	0.49
chr23 mapping	34245	SNV	1	G	A	113	113	100	0.42
chr23 mapping	34437	SNV	1	G	A	94	94	100	0.4
chr23 mapping	34935	SNV	1	C	T	108	113	95.58	0.48
chr23 mapping	35125	SNV	1	C	T	107	108	99.07	0.46
chr23 mapping	36099	SNV	1	A	G	100	100	100	0.49
chr23 mapping	36804	SNV	1	T	C	99	99	100	0.4
chr23 mapping	36819	SNV	1	A	G	93	94	98.94	0.37
chr23 mapping	38842	SNV	1	C	T	98	98	100	0.41	UBRO_20978:c.216C>T
chr23 mapping	39889	SNV	1	A	G	97	97	100	0.35
chr23 mapping	39900	SNV	1	A	G	98	98	100	0.38
chr23 mapping	42979	SNV	1	C	T	128	129	99.22	0.44	UBRO_13166:c.507C>T
chr23 mapping	43040	SNV	1	T	C	121	122	99.18	0.33	UBRO_13166:c.568T>C	UBRO_13166:p.Tyr190His
chr23 mapping	43263	SNV	1	T	C	94	96	97.92	0.47
chr23 mapping	44238	SNV	1	A	G	118	118	100	0.49
chr23 mapping	46982	SNV	1	G	C	146	149	97.99	0.42
chr23 mapping	47101	SNV	1	C	T	112	112	100	0.49
chr23 mapping	47666	SNV	1	C	A	97	97	100	0.44	UBRO_20979:c.979G>T	UBRO_20979:p.Asp327Tyr
chr23 mapping	48025	SNV	1	C	T	120	121	99.17	0.43	UBRO_20979:c.620G>A	UBRO_20979:p.Arg207Gln
chr23 mapping	48058	SNV	1	G	A	121	123	98.37	0.42	UBRO_20979:c.587C>T	UBRO_20979:p.Ala196Val
chr23 mapping	48496	SNV	1	T	C	109	109	100	0.47	UBRO_20979:c.149A>G	UBRO_20979:p.His50Arg
chr23 mapping	48660	SNV	1	G	A	120	120	100	0.43	UBRO_20979:c.102C>T
chr23 mapping	48705	SNV	1	G	A	105	106	99.06	0.49	UBRO_20979:c.57C>T
chr23 mapping	48925	SNV	1	T	C	131	132	99.24	0.47
chr23 mapping	48962	SNV	1	A	G	101	103	98.06	0.4
chr23 mapping	49336	SNV	1	A	G	95	97	97.94	0.36
chr23 mapping	49343	SNV	1	T	G	92	92	100	0.35
chr23 mapping	49376	SNV	1	C	T	88	96	91.67	0.37
chr23 mapping	49611	SNV	1	T	C	125	128	97.66	0.38	UBRO_20980:c.992A>G	UBRO_20980:p.Gln331Arg
chr23 mapping	49665	SNV	1	T	C	151	151	100	0.45	UBRO_20980:c.938A>G	UBRO_20980:p.His313Arg
chr23 mapping	49694	SNV	1	T	C	157	158	99.37	0.5	UBRO_20980:c.909A>G
chr23 mapping	49897	SNV	1	A	G	144	145	99.31	0.47	UBRO_20980:c.706T>C	UBRO_20980:p.Cys236Arg
chr23 mapping	50061	SNV	1	C	T	127	128	99.22	0.39	UBRO_20980:c.542G>A	UBRO_20980:p.Arg181Gln
chr23 mapping	50147	SNV	1	A	G	108	108	100	0.39	UBRO_20980:c.470-14T>C
chr23 mapping	50462	SNV	1	C	T	113	113	100	0.44	UBRO_20980:c.204G>A
chr23 mapping	50569	SNV	1	C	T	127	127	100	0.46	UBRO_20980:c.97G>A	UBRO_20980:p.Asp33Asn
chr23 mapping	51056	SNV	1	C	T	128	130	98.46	0.45
chr23 mapping	51214	SNV	1	T	C	123	124	99.19	0.48
chr23 mapping	52884	SNV	1	T	C	91	94	96.81	0.47	UBRO_13170:c.511A>G	UBRO_13170:p.Met171Val
chr23 mapping	53537	SNV	1	G	A	90	91	98.9	0.47
chr23 mapping	54905	SNV	1	C	T	102	103	99.03	0.44	UBRO_20981:c.1637G>A	UBRO_20981:p.Ser546Asn
chr23 mapping	55070	SNV	1	A	G	95	96	98.96	0.46	UBRO_20981:c.1472T>C	UBRO_20981:p.Leu491Pro
chr23 mapping	55416	SNV	1	C	T	110	110	100	0.48	UBRO_20981:c.1126G>A	UBRO_20981:p.Asp376Asn
chr23 mapping	57077	SNV	1	A	G	114	115	99.13	0.49
chr23 mapping	57183	SNV	1	T	C	113	114	99.12	0.42
chr23 mapping	57541	SNV	1	T	C	141	141	100	0.42
chr23 mapping	57758	SNV	1	G	A	136	140	97.14	0.46
chr23 mapping	57949	SNV	1	A	G	139	139	100	0.44
chr23 mapping	58050	SNV	1	C	T	148	148	100	0.48
chr23 mapping	58666	SNV	1	T	C	141	142	99.3	0.38	UBRO_13173:c.384T>C
chr23 mapping	59954	SNV	1	G	A	116	117	99.15	0.47	UBRO_13173:c.1601G>A	UBRO_13173:p.Arg534Lys
chr23 mapping	60603	SNV	1	A	G	114	124	91.94	0.46	UBRO_13173:c.2250A>G
chr23 mapping	61062	SNV	1	C	A	143	145	98.62	0.46	UBRO_13173:c.2709C>A	UBRO_13173:p.His903Gln
chr23 mapping	63359	SNV	1	A	G	127	127	100	0.43	UBRO_13173:c.4693A>G	UBRO_13173:p.Ser1565Gly
chr23 mapping	63715	SNV	1	T	G	141	141	100	0.43	UBRO_13173:c.5049T>G	UBRO_13173:p.Asn1683Lys
chr23 mapping	63902	SNV	1	G	A	134	136	98.53	0.5	UBRO_13173:c.5236G>A	UBRO_13173:p.Glu1746Lys
chr23 mapping	64661	SNV	1	C	T	112	113	99.12	0.49
